# Supplementary material for: Contributions of Hedgerows to People: A Global Meta-Analysis
Source: Frontiers journal article supplement (doi:10.3389/fcosc.2021.789612), 2021-12-22
Supplement: Data_Sheet_1.pdf [file Data_Sheet_1.pdf]

## Appendix S1

**SECTION A:** Studies used for comparing biodiversity between farmland with hedgerows and farmland without hedgerows.

| Identifier | Reference                                                                                                                                                                                                                                                                                                               |
|------------|-------------------------------------------------------------------------------------------------------------------------------------------------------------------------------------------------------------------------------------------------------------------------------------------------------------------------|
| WoS1.1     | Aavik & Liira. 2009. Agrotolerant and high nature-value species-plant biodiversity indicator groups in agroecosystems. <i>Ecological Indicators</i> 9: 892-901                                                                                                                                                          |
| WoS1.15    | Andresen et al. 2012. The wild flora biodiversity in pesticide free buffer zones along old hedgerows. <i>Journal of Environmental Biology</i> 33 (3): 565-572                                                                                                                                                           |
| WoS1.37    | Balfour et al. 2015. Following the dance: Ground survey of flowers and flower-visiting insects in a summer foraging hotspot identified via honeybee waggle dance decoding. <i>Agriculture Ecosystems &amp; Environment</i> 213: 265-271                                                                                 |
| WoS1.85    | Boutin et al. 2008. Plant diversity in crop fields and woody hedgerows of organic and conventional farms in contrasting landscapes. <i>Agriculture Ecosystems &amp; Environment</i> 123(1-3):185-193                                                                                                                    |
| WoS1.89    | Boutin et al. 2009. Arthropod diversity as affected by agricultural management (organic and conventional farming), plant species, and landscape context. <i>Ecoscience</i> 16 (4): 492-501                                                                                                                              |
| WoS1.90    | Boutin. 2006. Comparison of the vegetation and seedbanks of soybean fields, adjacent boundaries, and hedgerows in Ontario. <i>Canadian Journal of Plant Science</i> 86 (2): 557-567                                                                                                                                     |
| WoS2.11    | Burgio et al 2015 The Influence of Vegetation and Landscape Structural Connectivity on Butterflies (Lepidoptera: Papilionoidea and Hesperidae), Carabids (Coleoptera: Carabidae), Syrphids (Diptera: Syrphidae), and Sawflies (Hymenoptera: Symphyta) in Northern Italy Farmland <i>Environmental Entomology</i> 1: 1-9 |
| WoS2.26    | Castro-Caro et al. 2015 Effects of hedges and herbaceous cover on passerine communities in Mediterranean olive groves <i>Acta Ornithologica</i> 50(2): 180-192                                                                                                                                                          |
| WoS2.53    | Dainese et al. (2017) High cover of hedgerows in the landscape supports multiple ecosystem services in Mediterranean cereal fields <i>Journal of Applied Ecology</i> 54:380–388                                                                                                                                         |
| WoS2.75    | Debras et al. (2006) Discrimination between agricultural management and the hedge effect in pear orchards (south-eastern France) <i>Annals of Applied Biology</i> 149(3):347-355                                                                                                                                        |
| WoS3.8     | Dubois et al. (2009) Factors affecting the occurrence of the endangered saproxylic beetle <i>Osmoderma eremita</i> (Scopoli, 1763) (Coleoptera: Cetoniidae) in an agricultural landscape <i>Landscape and Urban Planning</i> 91:152–159                                                                                 |
| WoS3.11    | Dufnot et al. (2015) Reconsidering the role of ‘semi-natural habitat’ in agricultural landscape biodiversity: a case study <i>Ecological Research</i> 30: 75–83                                                                                                                                                         |
| WoS3.25    | Evans et al. (2011) Seeds in farmland food-webs: Resource importance, distribution, and the impacts of farm management <i>Biological Conservation</i> 144:2941–2950                                                                                                                                                     |
| WoS3.53    | Freemark et al. (2002) Importance of farmland habitats for conservation of plant species <i>Conservation Biology</i> 16(2):399-412                                                                                                                                                                                      |
| WoS3.83    | Girard et al (2014) Higher nestling food biomass in organic than conventional soybean fields in eastern Ontario, Canada <i>Agriculture, Ecosystems and Environment</i> 189:199–205                                                                                                                                      |
| WoS3.84    | Girma et al. (2000) Insect pests and beneficial arthropod populations under different hedgerow intercropping systems in semiarid Kenya <i>Agroforestry Systems</i> 50: 279–292                                                                                                                                          |
| WoS3.87    | González-Valdivia et al. (2014) Avifauna en sistemas silvopastoriles en el Corredor Biológico Mesoamericano, Tabasco, México <i>International Journal of Tropical Biology</i> 62 (3): 1031-1052                                                                                                                         |
| WoS4.7     | Guillot et al. (2016) Landscape influences the morphology of male common toads ( <i>Bufo bufo</i> ) <i>Agriculture, Ecosystems and Environment</i> 233:106–110                                                                                                                                                          |

|         |                                                                                                                                                                                                                                                    |
|---------|----------------------------------------------------------------------------------------------------------------------------------------------------------------------------------------------------------------------------------------------------|
| WoS4.17 | Hauser (2008) Groundnut/cassava/maize intercrop yields over three cycles of planted tree fallow/crop rotations on ultisol in southern Cameroon <i>Biological Agriculture and Horticulture</i> 25:379-399                                           |
| WoS4.41 | Hotaling et al. (2002) Breeding season bird use of restored wetland in eastern Maryland <i>Southeastern Naturalist</i> 1(3):233-252                                                                                                                |
| WoS4.59 | Jarvis et al. 2015. Distribution of crop wild relatives of conservation priority in the UK landscape <i>Biological Conservation</i> 191:444-451                                                                                                    |
| WoS4.71 | Jones and Haggard (1997) Impact of Nitrogen and organic manures on yield, botanical composition, and herbage quality of two contrasting grassland field margins <i>Biological Agriculture and Horticulture</i> 14(2):107-123                       |
| WoS4.76 | Kagawa and Maeto (2014) Ground beetle (Coleoptera: Carabidae) assemblages associated with asatoyama landscape in Japan: the effects of soil moisture, weed height, and distance from woodlands <i>Applied Entomology and Zoology</i> 49(3):429-436 |
| WoS4.84 | Klimek et al. (2014) Modelling the spatial distribution of species-rich farmland to identify priority areas for conservation actions <i>Biological Conservation</i> 174:65–74                                                                      |
| WoS4.85 | Koellner and Scholz (2008) Assessment of land use impacts on the natural environment part 2: generic characterization factors for local species diversity in central Europe <i>International Journal of Life Cycle Assessment</i> 13 (1): 32 – 48  |
| WoS5.1  | Laiolo (2003) Diversity and structure of the bird community overwintering in the Himalayan subalpine zone: is conservation compatible with tourism? <i>Biological Conservation</i> 115 (2): 251–262                                                |
| WoS5.8  | Le Viol et al (2008) Plant and spider communities benefit differently from the presence of planted hedgerows in highway verges. <i>Biological Conservation</i> 141(6): 1581-1590                                                                   |
| WoS5.25 | Love et al. 2009. Tree seedling establishment in living fences: a low-cost agroforestry management practice for the tropics. <i>Agroforestry Systems</i> 77(1): 1-8                                                                                |
| WoS5.31 | Luptacik et al (2012) Diversity and community structure of soil Oribatida (Acari) in an arable field with alluvial soils. <i>European Journal of Soil Biology</i> 50:97-105                                                                        |
| WoS5.42 | Mancinelli et al (2015) Impact of land ownership and altitude on biodiversity evaluated by indicators at the landscape level in Central Italy <i>Land Use Policy</i> 45: 43-51                                                                     |
| WoS5.71 | Merckx et al (2009) Optimizing the biodiversity gain from agri-environment schemes. <i>Agriculture Ecosystems &amp; Environment</i> 130(3-4): 177-182                                                                                              |
| WoS5.96 | Morandin and Kremen (2013) Hedgerow restoration promotes pollinator populations and exports native bees to adjacent fields. <i>Ecological Applications</i> 23(4): 829-839                                                                          |
| WoS5.98 | Morellet et al. (2011) Landscape composition influences roe deer habitat selection at both home range and landscape scales. <i>Landscape Ecology</i> 26(7): 999-1010                                                                               |
| WoS6.13 | Nascimbene et al. (2012) Organic farming benefits local plant diversity in vineyard farms located in intensive agricultural landscapes <i>Environmental Management</i> 49:1054–1060                                                                |
| WoS6.45 | Orlowski (2008) Roadside hedgerows and trees as factors increasing road mortality of birds: Implications for management of roadside vegetation in rural landscapes <i>Landscape and Urban Planning</i> 86: 153–161                                 |
| WoS6.60 | Paoletti et al. (2010) Soil invertebrates as bio-indicators in a natural area converted from agricultural use: the case study of Vallevecchia-Lugugnana in north-eastern Italy <i>Journal of Sustainable Agriculture</i> 34:38–56                  |
| WoS6.62 | Paoletti et al. (1999) Arthropods as bioindicators in agroecosystems of Jiang Han plain, Qianjiang city, Hubei China <i>Critical Reviews in Plant Sciences</i> , 18(3):457–465                                                                     |
| WoS6.65 | Parish et al. (1994) Modelling the relationship between bird population variables and hedgerow and other field margin attributes. I. species richness of winter, summer and breeding birds <i>Journal of Applied Ecology</i> 31(4):764-775         |
| WoS6.91 | Pinkus-Rendón et al. (2006) Spider diversity in a tropical habitat gradient in Chiapas, Mexico <i>Diversity and Distributions</i> 12: 61-69                                                                                                        |
| WoS7.2  | Ponisio et al. (2016) On-farm habitat restoration counters biotic homogenization in intensively managed agriculture <i>Global Change Biology</i> 22(2): 704-715                                                                                    |
| WoS7.5  | Power and Stout (2011) Organic dairy farming: impacts on insect–flower interaction networks and pollination <i>Journal of Applied Ecology</i> 48: 561–569                                                                                          |

|          |                                                                                                                                                                                                                                                    |
|----------|----------------------------------------------------------------------------------------------------------------------------------------------------------------------------------------------------------------------------------------------------|
| WoS7.47  | Sánchez-García et al. (2015) Supplementary winter food for gamebirds through feeders: which species actually benefit? <i>The Journal of Wildlife Management</i> 79(5): 832–845                                                                     |
| WoS7.48  | Sánchez Moreno et al. (2008) Nematode diversity, food web condition, and chemical and physical properties in different soil habitats of an organic farm <i>Biology and Fertility of Soils</i> 44(5): 727–744                                       |
| WoS7.54  | Sardiñas and Kremen (2015) Pollination services from field-scale agricultural diversification may be context-dependent <i>Agriculture, Ecosystems and Environment</i> 207: 17–25                                                                   |
| WoS7.73  | Sehgal (2011) Growth and productivity of <i>Ocimum basilicum</i> influenced by the application of organic manures under <i>Leucaena leucocephala</i> hedgerows in western Himalayan mid hills <i>Range Management and Agroforestry</i> 32(2):83–86 |
| WoS7.79  | Sheridan et al. (2009) Botanical rejuvenation of field margins and benefits for invertebrate fauna on a drystock farm in county longford Biology and environment- <i>Proceedidngs of the Royal Irish Academy</i> 109B(September): 95–106           |
| WoS7.93  | Slade et al. (2013) Life-history traits and landscape characteristics predict macro-moth responses to forest fragmentation <i>Ecology</i> 94(7): 1519–1530                                                                                         |
| WoS7.94  | Smith et al. (2008) The value of sown grass margins for enhancing soil macrofaunal biodiversity in arable systems <i>Agriculture, Ecosystems and Environment</i> 127: 119–125                                                                      |
| WoS7.95  | Smukler et al. (2010) Biodiversity and multiple ecosystem functions in an organic farmscape <i>Agriculture, Ecosystems and Environment</i> 139: 80–97                                                                                              |
| WoS8.5   | Stanley and Stout (2013) Quantifying the impacts of bioenergy crops on pollinating insect abundance and diversity: a field-scale evaluation reveals taxon-specific responses <i>Journal of Applied Ecology</i> 50: 335–344                         |
| WoS8.19  | Sullivan and Sullivan (2006) Plant and small mammal diversity in orchard versus non-crop habitats <i>Agriculture, Ecosystems and Environment</i> 116: 235–243                                                                                      |
| WoS8.25  | TangYa et al. (2003) Incorporation of mulberry in contour hedgerows to increase overall benefits: a case study from Ningnan County, Sichuan Province <i>China Agricultural Systems</i> 76: 775–785                                                 |
| WoS8.27  | Tattersall et al. (2002) Is habitat linearity important for small mammal communities on farmland? <i>Journal of Applied Ecology</i> 39(4): 643–652                                                                                                 |
| WoS8.38  | Thomas and Marshall (1999) Arthropod abundance and diversity in differently vegetated margins of arable fields <i>Agriculture, Ecosystems and Environment</i> 72: 131–144                                                                          |
| WoS8.49  | Tsiafouli et al. (2006) Soil nematode biodiversity in organic conventional agroecosystems of Northern Greece <i>Russian Journal of Nematology</i> 14(2): 159–169                                                                                   |
| WoS8.58  | Vandeveldt et al. (2014) Activity of European common bats along railway verges <i>Ecological Engineering</i> 64: 49–56                                                                                                                             |
| WoS8.65  | Varchola and Dunn (2001) Influence of hedgerow and grassy field borders on ground beetle (Coleoptera: Carabidae) activity in fields of corn <i>Agriculture, Ecosystems and Environment</i> 83: 153–163                                             |
| WoS8.69  | Vaughan et al. (2007) Spatial ecology and conservation of two sloth species in a cacao landscape in limón, Costa Rica <i>Biodiversity Conservation</i> 16: 2293–2310                                                                               |
| WoS8.73  | Verboom and Huitema (1997) The importance of linear landscape elements for the pipistrelle <i>Pipistrellus pipistrellus</i> and the serotine bat <i>Eptesicus serotins</i> <i>Landscape Ecology</i> 12(2): 117–125                                 |
| WoS8.98  | Wilkerson (2014) Using hedgerows as model linkages to examine non-native plant patterns <i>Agriculture, Ecosystems and Environment</i> 192: 38–46                                                                                                  |
| WoS9.4   | Wu et al. (2009) Responses of ground-dwelling spiders to four hedgerow species on sloped agricultural fields in Southwest China <i>Progress in Natural Science</i> 19: 337–346                                                                     |
| WoS10.8  | Assandri et al. (2018) Beautiful agricultural landscapes promote cultural ecosystem services and biodiversity conservation <i>Agriculture, Ecosystems and Environment</i> 256: 200–210                                                             |
| WoS10.66 | Heath et al. (2017) A bustle in the hedgerow: Woody field margins boost on farm avian diversity and abundance in an intensive agricultural landscape <i>Biological Conservation</i> 212: 153–161                                                   |

|           |                                                                                                                                                                                                                                                                       |
|-----------|-----------------------------------------------------------------------------------------------------------------------------------------------------------------------------------------------------------------------------------------------------------------------|
| WoS10.71  | Holden et al. (2019) The role of hedgerows in soil functioning within agricultural landscapes <i>Agriculture, Ecosystems and Environment</i> 273: 1–12                                                                                                                |
| WoS10.78  | Kebede et al. (2018) Implications of changes in land cover and landscape structure for the biocontrol potential of stemborers in Ethiopia <i>Biological Control</i> 122: 1–10                                                                                         |
| WoS10.88  | Lefebvre et al. (2017) Bayesian inferences of arthropod movements between hedgerows and orchards <i>Basic and Applied Ecology</i> 21: 76–84                                                                                                                           |
| WoS10.96  | Rangel-Acosta et al. (2017) Comparison of copro-necrophagous beetle assemblages (Scarabaeidae: Scarabaeinae) among tropical dry forest fragments and the adjacent matrix in the Atlántico Department of Colombia <i>Revista Mexicana de Biodiversidad</i> 88: 389–401 |
| WoS10.104 | McHugh et al. (2018) Use of field margins managed under an agri-environment scheme by foraging Barn Swallows <i>Hirundo rustica Bird Study</i> 65(3): 329–337                                                                                                         |
| WoS10.105 | Mestre et al. (2018) Both woody and herbaceous semi-natural habitats are essential for spider overwintering in European farmland <i>Agriculture, Ecosystems and Environment</i> 267: 141–146                                                                          |
| WoS10.123 | Ponisio et al. (2017) Opportunistic attachment assembles plant-pollinator networks <i>Ecology Letters</i> 20: 1261–1272                                                                                                                                               |
| WoS10.137 | Sellers et al. (2018) Impact of field-edge habitat on mammalian wildlife abundance, distribution, and vectored foodborne pathogens in adjacent crops <i>Crop Protection</i> 108: 1–11                                                                                 |
| WoS10.146 | Staley et al. 2017. Experimental evidence for optimal hedgerow cutting regimes for Brown hairstreak butterflies. <i>Insect Conservation and Diversity</i> 11: 213 - 218                                                                                               |

#### SECTION B: Studies used for comparing biodiversity between farmland with hedgerows and natural habitats.

| Identifier | Reference                                                                                                                                                                                                                         |
|------------|-----------------------------------------------------------------------------------------------------------------------------------------------------------------------------------------------------------------------------------|
| WoS1.40    | Balsby et al. 2003. Degradation of whitethroat vocalisations: Implications for song flight and communication network activities. <i>Behaviour</i> 140: 695–719                                                                    |
| WoS1.65    | Berwaerts et al. 1998. Morphological and genetic variation in the speckled wood butterfly ( <i>Pararge aegeria</i> L.) among differently fragmented landscapes. <i>Netherlands Journal of Zoology</i> 48 (3):241–253              |
| WoS2.1     | Buddle et al. 2004. Ground-dwelling spider assemblages inhabiting riparian forests and hedgerows in an agricultural landscape. <i>American Midland Naturalist</i> 151 (1):15–26                                                   |
| WoS2.20    | Camerini and Gropali (2014) Landfill restoration and biodiversity: A case of study in Northern Italy <i>Waste Management and Research</i> 32(8): 782–790                                                                          |
| WoS2.25    | Castagneyrol et al (2014) Egg mortality in the pine processionary moth: habitat diversity, microclimate and predation effects <i>Agricultural and Forest Entomology</i> 16: 284–292                                               |
| WoS2.27    | Ceresa et al (2012) The importance of key marginal habitat features for birds in farmland: an assessment of habitat preferences of Red-backed Shrikes <i>Lanius collurio</i> in the Italian Alps, <i>Bird Study</i> 59(3):327–334 |
| WoS2.45    | Costa et al. (2017) Variegated tropical landscapes conserve diverse dung beetle communities <i>PeerJ</i> 5:e3125                                                                                                                  |
| WoS2.71    | de la Peña and Bonte (2011) Soil biota effects on clonal growth and flowering in the forest herb <i>Stachys sylvatica</i> <i>Acta Oecologica</i> 37:110–116                                                                       |
| WoS3.11    | Duflot et al. (2015) Reconsidering the role of ‘semi-natural habitat’ in agricultural landscape biodiversity: a case study <i>Ecological Research</i> 30: 75–83                                                                   |
| WoS3.20    | Endels et al. (2004) Population structure and adult plant performance of forest herbs in three contrasting habitats <i>Ecography</i> 27(2):225–241                                                                                |
| WoS3.25    | Evans et al. (2011) Seeds in farmland food-webs: Resource importance, distribution and the impacts of farm management <i>Biological Conservation</i> 144:2941–2950                                                                |
| WoS3.53    | Freemark et al. (2002) Importance of farmland habitats for conservation of plant species <i>Conservation Biology</i> 16(2): 399–412                                                                                               |
| WoS3.57    | Fritz and Merriam (1996) Fencerow and forest edge architecture in eastern Ontario farmland <i>Agriculture, Ecosystems and Environment</i> 59 (1996): 159–170                                                                      |

|         |                                                                                                                                                                                                                                                    |
|---------|----------------------------------------------------------------------------------------------------------------------------------------------------------------------------------------------------------------------------------------------------|
| WoS3.60 | Fuentes-Montemayor et al. (2011) Pipistrelle bats and their prey do not benefit from four widely applied agri-environment management prescriptions <i>Biological Conservation</i> 144:2233–2246                                                    |
| WoS3.63 | Fuller et al. (2014) The response of ground-dwelling spiders (Araneae) and hoverflies (Diptera: Syrphidae) to afforestation assessed using within-site tracking <i>Forestry</i> 87: 301–312                                                        |
| WoS3.64 | Fuller et al (2001) Distributions of birds in lowland agricultural landscapes of England and Wales: How distinctive are bird communities of hedgerows and woodland? <i>Agriculture, Ecosystems and Environment</i> 84:79–92                        |
| WoS4.7  | Guillot et al. (2016) Landscape influences the morphology of male common toads ( <i>Bufo bufo</i> ) <i>Agriculture, Ecosystems and Environment</i> 233:106–110                                                                                     |
| WoS4.52 | Innes et al. (2010) Effect of grazing on ship rat density in forest fragments of lowland Waikato, New Zealand <i>New Zealand Journal of Ecology</i> 34(2): 227–232                                                                                 |
| WoS4.57 | Jahnová et al. (2016) The role of various meadow margin types in shaping carabid and staphylinid beetle assemblages (Coleoptera: Carabidae, Staphylinidae) in meadow dominated landscapes <i>Journal of Insect Conservation</i> 20:59–69           |
| WoS4.67 | Jobin et al. (1997) Effects of agricultural practices on the flora of hedgerows and woodland edges in southern Quebec. <i>Canadian Journal of Plant Sciences</i> 77: 293–299                                                                       |
| WoS4.76 | Kagawa and Maeto (2014) Ground beetle (Coleoptera: Carabidae) assemblages associated with asatoyama landscape in Japan: the effects of soil moisture, weed height, and distance from woodlands <i>Applied Entomology and Zoology</i> 49(3):429–436 |
| WoS4.84 | Klimek et al. (2014) Modelling the spatial distribution of species-rich farmland to identify priority areas for conservation actions <i>Biological Conservation</i> 174:65–74                                                                      |
| WoS4.93 | Kubes and Fuchs (1998) Village as a bird refuge in cultural landscape (largely agricultural landscape, The Czech Republic) <i>Ekológia (Bratislava)</i> 17(2):208–220                                                                              |
| WoS5.98 | Morellet et al. (2011) Landscape composition influences roe deer habitat selection at both home range and landscape scales. <i>Landscape Ecology</i> 26(7): 999–1010                                                                               |
| WoS6.7  | Muñoz et al. (2013) Contribution of woody habitat islands to the conservation of birds and their potential ecosystem services in an extensive Colombian rangeland <i>Agriculture, Ecosystems and Environment</i> 173:13– 19                        |
| WoS6.45 | Orlowski (2008) Roadside hedgerows and trees as factors increasing road mortality of birds: implications for management of roadside vegetation in rural landscapes <i>Landscape and Urban Planning</i> 86: 153–161                                 |
| WoS6.56 | Paine and Ribic (2002) Comparison of riparian plant communities under four land management systems in southwestern Wisconsin <i>Agriculture, Ecosystems and Environment</i> 92: 93–105                                                             |
| WoS6.62 | Paoletti et al. (1999) Arthropods as bioindicators in agroecosystems of Jiang Han plain, Qianjiang city, Hubei China <i>Critical Reviews in Plant Sciences</i> 18(3):457–465                                                                       |
| WoS6.82 | Petit and Usher (1998) Biodiversity in agricultural landscapes: the ground beetle communities of woody uncultivated habitats <i>Biodiversity and Conservation</i> 7: 1549–1561                                                                     |
| WoS6.91 | Pinkus-Rendón et al. (2006) Spider diversity in a tropical habitat gradient in Chiapas, Mexico <i>Diversity and Distributions</i> 12: 61–69                                                                                                        |
| WoS7.28 | Rhoades et al. (2004) Soil properties and soil Nitrogen dynamics of prairie-like forest openings and surrounding forests in Kentucky's Knobs region <i>The American Midland Naturalist</i> 152:1–11                                                |
| WoS7.43 | Sage et al. (2015) Using fledged brood counts of hedgerow birds to assess the effect of summer agri-environment scheme options <i>Ecological Indicators</i> 57: 376–383                                                                            |
| WoS7.65 | Schmuki and de Blois (2009) Population structures and individual performances of <i>Trillium grandiflorum</i> in hedgerow and forest habitats <i>Plant Ecology</i> 202:67–78                                                                       |
| WoS7.84 | Silva and Prince (2008) The conservation value of hedgerows for small mammals in Prince Edward Island, Canada <i>The American Midland Naturalist</i> 159(1): 110–124                                                                               |
| WoS7.93 | Slade et al. (2013) Life-history traits and landscape characteristics predict macro-moth responses to forest fragmentation <i>Ecology</i> 94(7): 1519–1530                                                                                         |

|           |                                                                                                                                                                                                                          |
|-----------|--------------------------------------------------------------------------------------------------------------------------------------------------------------------------------------------------------------------------|
| WoS7.94   | Smith et al. (2008) The value of sown grass margins for enhancing soil macrofaunal biodiversity in arable systems <i>Agriculture, Ecosystems and Environment</i> 127: 119–125                                            |
| WoS8.19   | Sullivan and Sullivan (2006) Plant and small mammal diversity in orchard versus non-crop habitats <i>Agriculture, Ecosystems and Environment</i> 116: 235–243                                                            |
| WoS8.23   | Tang et al. (2014) Effects of corridor networks on plant species composition and diversity in an intensive agriculture landscape <i>Chinese Geographical Science</i> 24(1): 93–103                                       |
| WoS8.27   | Tattersall et al. (2002) Is habitat linearity important for small mammal communities on farmland? <i>Journal of Applied Ecology</i> 39(4): 643–652                                                                       |
| WoS8.69   | Vaughan et al. (2007) Spatial ecology and conservation of two sloth species in a cacao landscape in limón, Costa Rica <i>Biodiversity Conservation</i> 16: 2293–2310                                                     |
| WoS10.8   | Assandri et al. (2018) Beautiful agricultural landscapes promote cultural ecosystem services and biodiversity conservation <i>Agriculture, Ecosystems and Environment</i> 256: 200–210                                   |
| WoS10.25  | Burrow et al. (2018) Influence of connectivity & topsoil management practices of a constructed technosol on pedofauna colonization: A field study <i>Applied Soil Ecology</i> 123(SI):416–419                            |
| WoS10.157 | Van Den Berge et al. (2018) Species diversity, pollinator resource value and edibility potential of woody networks in the countryside in northern Belgium. <i>Agriculture, Ecosystems &amp; Environment</i> 259: 119–126 |

**SECTION C:** Studies used for comparing ecosystem services provided by farmland with hedgerows and farmland without hedgerows.

| Identifier | Reference                                                                                                                                                                                                                                                                                        |
|------------|--------------------------------------------------------------------------------------------------------------------------------------------------------------------------------------------------------------------------------------------------------------------------------------------------|
| WoS1.5     | Agus et al. (1997) Soil-water and soil physical properties under contour hedgerow systems on sloping oxisols. <i>Soil &amp; Tillage Research</i> 40: 185–199                                                                                                                                     |
| WoS1.8     | Alegre & Rao (1996) Soil and water conservation by contour hedging in the humid tropics of Peru. <i>Agriculture, Ecosystem and Environment</i> 57: 17–25                                                                                                                                         |
| WoS1.80    | Borin et al. (2010) Multiple functions of buffer strips in farming areas. <i>European Journal of Agronomy</i> 32 (1):103–111                                                                                                                                                                     |
| WoS1.90    | Boutin (2006) Comparison of the vegetation and seedbanks of soybean fields, adjacent boundaries, and hedgerows in Ontario. <i>Canadian Journal of Plant Science</i> 86 (2): 557–567                                                                                                              |
| WoS10.107  | Garzia et al.(2018) Effects of vegetation structure and landscape complexity on insect parasitism across an agricultural frontier in Argentina <i>Basic and Applied Ecology</i> 29: 69–78                                                                                                        |
| WoS10.138  | Sharma et al. (2018) Entomopathogenic fungi in Portuguese vineyards soils: suggesting a ‘Galleria-Tenebrio-bait method’ as bait insects Galleria and Tenebrio significantly underestimate the respective recoveries of Metarhizium (robertsii) and Beauveria (bassiana) <i>MycoKeys</i> 38: 1–23 |
| WoS10.139  | Sharma et al. (2018) Soil chemical properties barely perturb the abundance of entomopathogenic <i>Fusarium oxysporum</i> : a case study using a generalized linear mixed model for microbial pathogen occurrence count data <i>Pathogens</i> 7: 89                                               |
| WoS10.15   | Baumert et al. (2018) Greenhouse gas and energy balance of <i>Jatropha</i> biofuel production systems of Burkina Faso <i>Energy for Sustainable Development</i> 42: 14–23                                                                                                                        |
| WoS10.71   | Holden et al. (2019) The role of hedgerows in soil functioning within agricultural landscapes <i>Agriculture, Ecosystems and Environment</i> 273: 1–12                                                                                                                                           |
| WoS2.10    | Burgio and Sommaggio (2007) Syrphids as landscape bioindicators in Italian agroecosystems <i>Agriculture, Ecosystems and Environment</i> 120: 416–422                                                                                                                                            |
| WoS2.53    | Dainese et al. (2017) High cover of hedgerows in the landscape supports multiple ecosystem services in Mediterranean cereal fields <i>Journal of Applied Ecology</i> 54:380–388                                                                                                                  |
| WoS3.51    | Franco (1998) Hedgerows and non point source pollution: field test and landscape planning <i>Key Concepts in Landscape Ecology</i> 392–398                                                                                                                                                       |

|            |                                                                                                                                                                                                                                                    |
|------------|----------------------------------------------------------------------------------------------------------------------------------------------------------------------------------------------------------------------------------------------------|
| WoS3.84    | Girma et al. (2000) Insect pests and beneficial arthropod populations under different hedgerow intercropping systems in semiarid Kenya <i>Agroforestry Systems</i> 50: 279–292                                                                     |
| WoS4.17    | Hauser (2008) Groundnut/cassava/maize intercrop yields over three cycles of planted tree fallow/crop rotations on ultisol in southern Cameroon <i>Biological Agriculture and Horticulture</i> 25:379-399                                           |
| WoS4.22    | Henry et al. (2009) Biodiversity, carbon stocks and sequestration potential in aboveground biomass in smallholder farming systems of western Kenya <i>Agriculture, Ecosystems and Environment</i> 12:238–252                                       |
| WoS4.70    | Jones et al. (2001) The effect of provenance on the performance of <i>Crataegus monogyna</i> in hedges <i>Journal of Applied Ecology</i> 38:952-962                                                                                                |
| WoS4.87    | Koudokpon et al. (1994) Priority setting in research for sustainable land use: the case of the Adja Plateau, Benin <i>Agroforestry Systems</i> 26:101-122                                                                                          |
| WoS5.31    | Luptacik et al (2012) Diversity and community structure of soil Oribatida (Acari) in an arable field with alluvial soils. <i>European Journal of Soil Biology</i> 50:97-105                                                                        |
| WoS5.37    | Macfadyen et al. (2011) Parasitoid diversity reduces the variability in pest control services across time on farms. <i>Proceedings of the Royal Society B-Biological Sciences</i> 278(1723): 3387-3394                                             |
| WoS5.38    | MacLean et al. (2003) Impact of <i>Gliricidia sepium</i> and <i>Cassia spectabilis</i> hedgerows on weeds and insect pests of upland rice. <i>Agriculture Ecosystems and Environment</i> 94(3): 275-288                                            |
| WoS5.64    | Menalled et al (2000) Post-dispersal weed seed predation in Michigan crop fields as a function of agricultural landscape structure. <i>Agriculture Ecosystems &amp; Environment</i> 77(3): 193-202                                                 |
| WoS5.89    | Monokrousos et al (2006) Soil quality variables in organically and conventionally cultivated field sites. <i>Soil Biology &amp; Biochemistry</i> 38(6): 1282-1289                                                                                  |
| WoS6.46bis | Ortiz (1995) Plot techniques for assessment of bunch weight in banana trials under two systems of crop management <i>Agronomy Journal</i> 87:63-69                                                                                                 |
| WoS6.6     | Mugendi et al. (2000) Nitrogen recovery by alley-cropped maize and trees from <sup>15</sup> N-labeled tree biomass in the subhumid highlands of Kenya <i>Biology and Fertility of Soils</i> 31:97–101                                              |
| WoS6.8     | Mureithi et al. (1995) Productivity of alley farming with leucaena ( <i>Leucaena leucocephala</i> Lam. de Wit) and Napier grass ( <i>Pennisetum purpureum</i> K. Schum) in coastal lowland Kenya <i>Agroforestry Systems</i> 31: 59-78             |
| WoS6.91    | Pinkus-Rendón et al. (2006) Spider diversity in a tropical habitat gradient in Chiapas, Mexico <i>Diversity and Distributions</i> 12: 61-69                                                                                                        |
| WoS7.11    | Radrizanni et al. (2011) Soil organic carbon and total nitrogen under <i>Leucaena leucocephala</i> pastures in Queensland <i>Crop &amp; Pasture Science</i> 62: 337–345                                                                            |
| WoS7.20    | Rao et al. (1991) Productivity of annual cropping and agroforestry systems on a shallow Alfisol in semi-arid India <i>Agroforestry Systems</i> 15: 51-63                                                                                           |
| WoS7.48    | Sánchez Moreno et al. (2008) Nematode diversity, food web condition, and chemical and physical properties in different soil habitats of an organic farm <i>Biology and Fertility of Soils</i> 44(5): 727-744                                       |
| WoS7.54    | Sardiñas and Kremen (2015) Pollination services from field-scale agricultural diversification may be context-dependent <i>Agriculture, Ecosystems and Environment</i> 207: 17–25                                                                   |
| WoS7.73    | Sehgal (2011) Growth and productivity of <i>Ocimum basilicum</i> influenced by the application of organic manures under <i>Leucaena leucocephala</i> hedgerows in western Himalayan mid hills <i>Range Management and Agroforestry</i> 32(2):83-86 |
| WoS7.74    | Seiter et al. (1999) Crop yield and tree-leaf production in three planting patterns of temperate-zone alley cropping in Oregon, USA <i>Agroforestry Systems</i> 46: 273–288                                                                        |
| WoS7.80    | Shively (1999) Risks and returns from soil conservation: evidence from low-income farms in the Philippines <i>Agricultural Economics</i> 21:53-67                                                                                                  |
| WoS7.94    | Smith et al. (2008) The value of sown grass margins for enhancing soil macrofaunal biodiversity in arable systems <i>Agriculture, Ecosystems and Environment</i> 127: 119–125                                                                      |

|         |                                                                                                                                                                                                                   |
|---------|-------------------------------------------------------------------------------------------------------------------------------------------------------------------------------------------------------------------|
| WoS7.95 | Smukler et al. (2010) Biodiversity and multiple ecosystem functions in an organic farmscape <i>Agriculture, Ecosystems and Environment</i> 139: 80–97                                                             |
| WoS8.24 | Tang et al (2014) Farmers’ sustainable strategies for soil conservation on sloping arable lands in the upper Yangtze river basin <i>China Sustainability</i> 6: 4795-1806                                         |
| WoS8.25 | TangYa et al. (2003) Incorporation of mulberry in contour hedgerows to increase overall benefits: a case study from Ningnan County, Sichuan Province <i>China Agricultural Systems</i> 76: 775–785                |
| WoS8.37 | Thiel et al. (2015) Using hedgerow biodiversity to enhance the carbon storage of farmland in the Fraser River delta of British Columbia <i>Journal of Soil and Water Conservation</i> 70(4): 247-256              |
| WoS8.48 | Tossah et al. (1999) Alley cropping in the moist savanna of West-Africa: II. Impact on soil productivity in a North-to-South transect in Togo <i>Agroforestry Systems</i> 42: 229–244                             |
| WoS8.69 | Vaughan et al. (2007) Spatial ecology and conservation of two sloth species in a cacao landscape in limón, Costa Rica <i>Biodiversity Conservation</i> 16: 2293–2310                                              |
| WoS8.82 | Vourc’h et al. (2008) Mammal and bird species distribution at the woodland–pasture interface in relation to the circulation of ticks and pathogens <i>Animal Biodiversity and Emerging Diseases</i> 1149: 322–325 |
| WoS8.91 | Whitmore et al. (2000) An analysis of the economic values of novel cropping systems in N. E. Thailand and S. Sumatra Netherlands <i>Journal of Agricultural Science</i> 48: 105-114                               |
| WoSE.4  | Timberlake et al (2019) Phenology of farmland floral resources reveals seasonal gaps in nectar availability for bumblebees. <i>Journal of Applied Ecology</i> 56(7): 1585-1596                                    |

**SECTION D: Studies used for comparing the ecosystem services provided by farmland with hedgerows and natural habitat.**

| Identifier | Reference                                                                                                                                                                                                         |
|------------|-------------------------------------------------------------------------------------------------------------------------------------------------------------------------------------------------------------------|
| WoS10.26   | Byrne and delBarco-Trillo (2019) The effect of management practices on bumblebee densities in hedgerow and grassland habitats <i>Basic and Applied Ecology</i> 35: 28–33                                          |
| WoS3.12    | Dulaurent et al. (2012) Hide and seek in forests: colonization by the pine processionary moth is impeded by the presence of nonhost trees <i>Agricultural and Forest Entomology</i> 14: 19–27                     |
| WoS3.20    | Endels et al. (2004) Population structure and adult plant performance of forest herbs in three contrasting habitats <i>Ecography</i> 27(2):225-241                                                                |
| WoS3.57    | Fritz and Merriam (1996) Fencerow and forest edge architecture in eastern Ontario farmland <i>Agriculture, Ecosystems and Environment</i> 59: 159-170                                                             |
| WoS3.63    | Fuller et al. (2014) The response of ground-dwelling spiders (Araneae) and hoverflies (Diptera: Syrphidae) to afforestation assessed using within-site tracking <i>Forestry</i> 87: 301–312                       |
| WoS6.86    | Pfister et al. (2017) Positive effects of local and landscape features on predatory flies in European agricultural landscapes <i>Agriculture, Ecosystems and Environment</i> 239: 283–292                         |
| WoS6.91    | Pinkus-Rendón et al. (2006) Spider diversity in a tropical habitat gradient in Chiapas, Mexico <i>Diversity and Distributions</i> 12: 61-69                                                                       |
| WoS7.28    | Rhoades et al. (2004) Soil properties and soil Nitrogen dynamics of prairie-like forest openings and surrounding forests in Kentucky’s Knobs region <i>The American Midland Naturalist</i> 152:1–11               |
| WoS7.64    | Schmuki and de Blois (2009) Pollination and reproduction of a self-incompatible forest herb in hedgerow corridors and forest patches <i>Oecologia</i> 160:721–733                                                 |
| WoS7.94    | Smith et al. (2008) The value of sown grass margins for enhancing soil macrofaunal biodiversity in arable systems <i>Agriculture, Ecosystems and Environment</i> 127: 119–125                                     |
| WoS8.82    | Vourc’h et al. (2008) Mammal and bird species distribution at the woodland–pasture interface in relation to the circulation of ticks and pathogens <i>Animal Biodiversity and Emerging Diseases</i> 1149: 322–325 |
