# Supplementary material for: Contributions of Hedgerows to People: A Global Meta-Analysis
Source: Frontiers journal article supplement (doi:10.3389/fcosc.2021.789612), 2021-12-22
Supplement: Table_1.XLSX [file Table_1.XLSX]

## Sheet: Hoja1
Identifier	New.sign	New.Response	New.Taxa	nHedgerow	nControl	Hedgerow.Value	Hedgerow.SD	Farmland.Value	Farmland.SD	Farmland.type	Crop.type	Climate.type	Spatial.Scale.Focus
WoS1.1	1	Diversity	Plants	1558	1558	8	0.25	5	0.5	Pasture	NA	Temperate	Field
WoS1.15	1	Diversity	Plants	4	4	1.12	0.09	0.46	0.12	Crop	Herbaceous	Temperate	Field
WoS1.15	1	Diversity	Plants	4	4	1.27	0.04	0.43	0.06	Crop	Herbaceous	Temperate	Field
WoS1.37	1	Diversity	Plants	311	311	4.1	1	1.8	0.2	Crop	Herbaceous	Temperate	Field
WoS1.85	1	Diversity	Plants	30	30	9	2	1	2	Crop	Herbaceous	Temperate	Field
WoS1.85	1	Diversity	Plants	30	30	13	2	4	2	Crop	Herbaceous	Temperate	Field
WoS1.85	-1	Diversity	Plants	30	30	9	3	7	3	Crop	Herbaceous	Temperate	Field
WoS1.85	-1	Diversity	Plants	30	30	17	3	11	3	Crop	Herbaceous	Temperate	Field
WoS1.89	1	Diversity	Invertebrates	41	41	20.5	3.5	14	5	Crop	Herbaceous	Temperate	Landscape
WoS1.89	1	Diversity	Invertebrates	41	41	10	2	8.5	2.5	Crop	Herbaceous	Temperate	Landscape
WoS1.89	1	Abundance	Invertebrates	41	41	200	120	100	80	Crop	Herbaceous	Temperate	Landscape
WoS1.89	-1	Abundance	Invertebrates	41	41	105	15	175	55	Crop	Herbaceous	Temperate	Landscape
WoS1.90	1	Diversity	Plants	10	10	20	9.49	7	9.49	Crop	Herbaceous	Temperate	Field
WoS1.90	1	Diversity	Plants	10	10	17	15.81	7	9.49	Crop	Herbaceous	Temperate	Field
WoS1.90	1	Abundance	Plants	10	10	1400	1581.14	250	790.57	Crop	Herbaceous	Temperate	Field
WoS2.11	1	Diversity	Invertebrates	9	9	39	4.41	29	0	Crop	Herbaceous	Temperate	Landscape
WoS2.11	1	Diversity	Invertebrates	9	9	62	3.92	28	0	Crop	Herbaceous	Temperate	Landscape
WoS2.11	1	Diversity	Invertebrates	9	9	55	6.6	15	0	Crop	Herbaceous	Temperate	Landscape
WoS2.11	1	Diversity	Invertebrates	9	9	41	6.77	6	0	Crop	Herbaceous	Temperate	Landscape
WoS2.11	1	Diversity	Plants	9	9	197	15.44	78	0	Crop	Herbaceous	Temperate	Landscape
WoS2.26	1	Diversity	Vertebrates	7	7	2.09	2.25	1.14	1.54	Crop	Woody	Temperate	Field
WoS2.53	1	Diversity	Plants	8	8	20	6.7	16.1	5.6	Crop	Herbaceous	Temperate	Field
WoS2.53	1	Diversity	Plants	8	8	17.3	6	16.1	5.6	Crop	Herbaceous	Temperate	Field
WoS2.75	1	Diversity	Invertebrates	17	17	2.49	0.58	2.98	2.39	Crop	Woody	Temperate	Field
WoS2.75	1	Diversity	Invertebrates	17	17	3.03	0.3	2.75	0.66	Crop	Woody	Temperate	Field
WoS2.75	1	Diversity	Invertebrates	17	17	0.69	0.5	0.62	0.42	Crop	Woody	Temperate	Field
WoS2.75	1	Diversity	Invertebrates	17	17	0.51	0.11	0.68	0.2	Crop	Woody	Temperate	Field
WoS2.75	1	Diversity	Invertebrates	17	17	0.84	0.1	0.74	0.2	Crop	Woody	Temperate	Field
WoS2.75	1	Diversity	Invertebrates	17	17	0.25	0.16	0.21	0.12	Crop	Woody	Temperate	Field
WoS2.75	1	Diversity	Invertebrates	17	17	30.4	10.71	27	16.65	Crop	Woody	Temperate	Field
WoS2.75	1	Diversity	Invertebrates	17	17	12.8	3.27	15	7.17	Crop	Woody	Temperate	Field
WoS2.75	1	Diversity	Invertebrates	17	17	8.2	4.49	9.2	6.26	Crop	Woody	Temperate	Field
WoS2.75	1	Abundance	Invertebrates	17	17	704	572.97	702.2	599.8	Crop	Woody	Temperate	Field
WoS2.75	1	Abundance	Invertebrates	17	17	51	47.52	70.6	88.95	Crop	Woody	Temperate	Field
WoS2.75	1	Abundance	Invertebrates	17	17	443.6	534.49	415.6	445.71	Crop	Woody	Temperate	Field
WoS3.8	1	Abundance	Plants	59	59	14.4	20.74	7.8	9.22	Crop	Woody	Temperate	Landscape
WoS3.8	1	Abundance	Plants	432	432	20.7	43.65	10.3	37.41	Crop	Woody	Temperate	Landscape
WoS3.11	1	Diversity	Invertebrates	10	10	10.5	1.58	14.1	3.16	Crop	Herbaceous	Temperate	Landscape
WoS3.11	1	Diversity	Plants	10	10	20.3	1.58	8.3	1.58	Crop	Herbaceous	Temperate	Landscape
WoS3.25	1	Abundance	Plants	20	20	13826	31023.2	5310	15308.1	Crop	Herbaceous	Temperate	Field
WoS3.25	1	Abundance	Plants	12	12	13826	24030.5	1273	3135.01	Crop	Herbaceous	Temperate	Field
WoS3.25	1	Abundance	Plants	5	5	13826	15511.6	808	686.47	Crop	Herbaceous	Temperate	Field
WoS3.25	1	Abundance	Plants	28	28	13826	36707.2	426	576.77	Crop	Herbaceous	Temperate	Field
WoS3.25	1	Abundance	Plants	12	12	1892	2611.93	786	2057.68	Crop	Herbaceous	Temperate	Field
WoS3.25	1	Abundance	Plants	12	12	1892	2611.93	1289	2535.72	Crop	Herbaceous	Temperate	Field
WoS3.25	1	Abundance	Plants	12	12	1892	2611.93	5484	7718.02	Crop	Herbaceous	Temperate	Field
WoS3.25	1	Abundance	Plants	12	12	1892	2611.93	25785	18429	Crop	Herbaceous	Temperate	Field
WoS3.25	1	Abundance	Plants	12	12	1892	2611.93	9316	11327.6	Crop	Herbaceous	Temperate	Field
WoS3.25	1	Abundance	Plants	14	14	671852	365448	9991	10042.6	Crop	Herbaceous	Temperate	Field
WoS3.25	1	Abundance	Plants	13	13	671852	352154	12255	25347	Crop	Herbaceous	Temperate	Field
WoS3.25	1	Abundance	Plants	12	12	671852	338339	12289	19759.2	Crop	Herbaceous	Temperate	Field
WoS3.25	1	Abundance	Plants	11	11	671852	323935	471468	529619	Crop	Herbaceous	Temperate	Field
WoS3.25	1	Abundance	Plants	12	12	671852	338339	31495	40692.8	Crop	Herbaceous	Temperate	Field
WoS3.25	1	Abundance	Plants	23	23	33663	5496.02	2340	4800.63	Crop	Herbaceous	Temperate	Field
WoS3.25	1	Abundance	Plants	23	23	33663	5496.02	3196	5975.61	Crop	Herbaceous	Temperate	Field
WoS3.25	1	Abundance	Plants	24	24	33663	5614.23	1163	1131.66	Crop	Herbaceous	Temperate	Field
WoS3.53	1	Diversity	Plants	45	45	29	16.1	8	6.04	Crop	Herbaceous	Temperate	Field
WoS3.53	1	Diversity	Plants	45	45	29	16.1	7	22.14	Crop	Herbaceous	Temperate	Field
WoS3.53	1	Diversity	Plants	45	45	19	10.73	8	6.04	Crop	Herbaceous	Temperate	Field
WoS3.53	1	Diversity	Plants	45	45	19	10.73	5	17.44	Crop	Herbaceous	Temperate	Field
WoS3.53	1	Diversity	Plants	45	45	5	3.35	1	2.01	Crop	Herbaceous	Temperate	Field
WoS3.53	1	Diversity	Plants	45	45	5	3.35	1	2.01	Crop	Herbaceous	Temperate	Field
WoS3.53	1	Diversity	Plants	45	45	8	6.04	2	1.34	Crop	Herbaceous	Temperate	Field
WoS3.53	1	Diversity	Plants	45	45	8	6.04	2	6.04	Crop	Herbaceous	Temperate	Field
WoS3.53	1	Diversity	Plants	45	45	42	20.12	32	28.85	Crop	Herbaceous	Temperate	Field
WoS3.53	1	Diversity	Plants	45	45	42	20.12	32	6.04	Crop	Herbaceous	Temperate	Field
WoS3.53	-1	Diversity	Plants	45	45	10	6.71	5	5.37	Crop	Herbaceous	Temperate	Field
WoS3.53	-1	Diversity	Plants	45	45	10	6.71	3	12.07	Crop	Herbaceous	Temperate	Field
WoS3.53	-1	Diversity	Plants	45	45	51	23.48	61	24.82	Crop	Herbaceous	Temperate	Field
WoS3.53	-1	Diversity	Plants	45	45	51	23.48	65	3.35	Crop	Herbaceous	Temperate	Field
WoS3.53	-1	Diversity	Plants	45	45	9.5	6.04	5.7	4.7	Crop	Herbaceous	Temperate	Field
WoS3.53	-1	Diversity	Plants	45	45	9.5	6.04	2.9	10.06	Crop	Herbaceous	Temperate	Field
WoS3.53	-1	Abundance	Plants	45	45	51.3	22.81	74.3	26.16	Crop	Herbaceous	Temperate	Field
WoS3.53	-1	Abundance	Plants	45	45	51.3	22.81	59.3	102.64	Crop	Herbaceous	Temperate	Field
WoS3.53	-1	Abundance	Plants	45	45	34.7	21.47	74.3	26.16	Crop	Herbaceous	Temperate	Field
WoS3.53	-1	Abundance	Plants	45	45	34.7	21.47	30.7	4.7	Crop	Herbaceous	Temperate	Field
WoS3.53	1	Diversity	Plants	45	45	3.4	3.35	1.8	1.34	Crop	Herbaceous	Temperate	Field
WoS3.53	1	Diversity	Plants	45	45	3.4	3.35	0.6	2.01	Crop	Herbaceous	Temperate	Field
WoS3.53	-1	Diversity	Plants	45	45	6.1	4.7	3.9	4.7	Crop	Herbaceous	Temperate	Field
WoS3.53	-1	Diversity	Plants	45	45	6.1	4.7	2.3	8.05	Crop	Herbaceous	Temperate	Field
WoS3.53	-1	Diversity	Plants	45	45	4.2	2.68	4.4	3.35	Crop	Herbaceous	Temperate	Field
WoS3.53	-1	Diversity	Plants	45	45	4.2	2.68	1.6	4.7	Crop	Herbaceous	Temperate	Field
WoS3.53	-1	Abundance	Plants	45	45	22.4	13.42	59.3	28.85	Crop	Herbaceous	Temperate	Field
WoS3.53	-1	Abundance	Plants	45	45	22.4	13.42	36.2	60.37	Crop	Herbaceous	Temperate	Field
WoS3.53	-1	Abundance	Plants	45	45	15.4	12.07	59.3	28.85	Crop	Herbaceous	Temperate	Field
WoS3.53	-1	Abundance	Plants	45	45	15.4	12.07	19	44.27	Crop	Herbaceous	Temperate	Field
WoS3.53	-1	Diversity	Plants	45	45	1.8	1.34	1.8	1.34	Crop	Herbaceous	Temperate	Field
WoS3.53	-1	Diversity	Plants	45	45	1.8	1.34	0.3	1.34	Crop	Herbaceous	Temperate	Field
WoS3.53	-1	Diversity	Plants	45	45	2.4	2.68	2.5	2.68	Crop	Herbaceous	Temperate	Field
WoS3.53	-1	Diversity	Plants	45	45	2.4	2.68	1.2	3.35	Crop	Herbaceous	Temperate	Field
WoS3.53	-1	Diversity	Plants	45	45	5.3	4.02	1.4	2.68	Crop	Herbaceous	Temperate	Field
WoS3.53	-1	Diversity	Plants	45	45	5.3	4.02	1.3	6.04	Crop	Herbaceous	Temperate	Field
WoS3.53	-1	Abundance	Plants	45	45	28.9	19.45	15	19.45	Crop	Herbaceous	Temperate	Field
WoS3.53	-1	Abundance	Plants	45	45	28.9	19.45	23.1	57.69	Crop	Herbaceous	Temperate	Field
WoS3.53	-1	Abundance	Plants	45	45	19.3	13.42	15	19.45	Crop	Herbaceous	Temperate	Field
WoS3.53	-1	Abundance	Plants	45	45	19.3	13.42	11.8	33.54	Crop	Herbaceous	Temperate	Field
WoS3.53	1	Diversity	Plants	45	45	1.6	2.68	0	0	Crop	Herbaceous	Temperate	Field
WoS3.53	1	Diversity	Plants	45	45	1.6	2.68	0.2	1.34	Crop	Herbaceous	Temperate	Field
WoS3.53	-1	Diversity	Plants	45	45	3.7	3.35	1.4	2.68	Crop	Herbaceous	Temperate	Field
WoS3.53	-1	Diversity	Plants	45	45	3.7	3.35	1.1	4.7	Crop	Herbaceous	Temperate	Field
WoS3.83	1	Abundance	Vertebrates	9	9	0.05	0.06	0.06	0.06	Crop	Herbaceous	Temperate	Field
WoS3.83	1	Abundance	Vertebrates	9	9	0.07	0.06	0.1	0.09	Crop	Herbaceous	Temperate	Field
WoS3.83	1	Abundance	Vertebrates	9	9	0.04	0.06	0.14	0.09	Crop	Herbaceous	Temperate	Field
WoS3.83	1	Abundance	Vertebrates	9	9	0.06	0.06	0.2	0.15	Crop	Herbaceous	Temperate	Field
WoS3.84	1	Abundance	Invertebrates	9	9	5	7.15	8	11.12	Crop	Herbaceous	Tropical	Field
WoS3.84	1	Abundance	Invertebrates	9	9	22	33.42	15	33.42	Crop	Herbaceous	Tropical	Field
WoS3.84	1	Abundance	Invertebrates	9	9	32	65.13	24	30.78	Crop	Herbaceous	Tropical	Field
WoS3.87	1	Diversity	Vertebrates	3	3	60	4.78	67	2.49	Pasture	NA	Tropical	Landscape
WoS3.87	1	Abundance	Vertebrates	3	3	274	53.47	421	66.8	Pasture	NA	Tropical	Landscape
WoS3.87	1	Abundance	Vertebrates	3	3	3	0.07	3	0.14	Pasture	NA	Tropical	Landscape
WoS3.87	1	Abundance	Vertebrates	3	3	4	0.47	5	0.47	Pasture	NA	Tropical	Landscape
WoS3.87	1	Abundance	Vertebrates	3	3	3	0.47	3	0.94	Pasture	NA	Tropical	Landscape
WoS3.87	1	Abundance	Vertebrates	3	3	7	0	9	1.25	Pasture	NA	Tropical	Landscape
WoS3.87	1	Abundance	Vertebrates	3	3	6	0.82	9	1.7	Pasture	NA	Tropical	Landscape
WoS3.87	1	Diversity	Vertebrates	3	3	12	2.45	15	3.09	Pasture	NA	Tropical	Landscape
WoS3.87	1	Abundance	Vertebrates	3	3	55	27.79	108	20.12	Pasture	NA	Tropical	Landscape
WoS3.87	1	Abundance	Vertebrates	3	3	55	27.79	108	20.12	Pasture	NA	Tropical	Landscape
WoS4.7	1	Abundance	Vertebrates	12	12	71	1.73	70	1.73	Pasture	NA	Temperate	Landscape
WoS4.7	1	Abundance	Vertebrates	12	12	43	1.73	34	3.46	Pasture	NA	Temperate	Landscape
WoS4.7	1	Abundance	Vertebrates	12	12	28	1.73	28	1.73	Pasture	NA	Temperate	Landscape
WoS4.7	1	Abundance	Vertebrates	12	12	16.25	1.73	21.25	1.56	Pasture	NA	Temperate	Landscape
WoS4.17	1	Abundance	Plants	3	3	1.86	0.22	2.19	0.77	Crop	Herbaceous	Tropical	Field
WoS4.17	1	Abundance	Plants	3	3	2.08	0.55	2.19	0.77	Crop	Herbaceous	Tropical	Field
WoS4.17	1	Abundance	Plants	3	3	1.97	0.46	2.19	0.77	Crop	Herbaceous	Tropical	Field
WoS4.41	1	Abundance	Vertebrates	21	21	44	32.54	5	8.71	Crop	Herbaceous	Temperate	Field
WoS4.41	1	Diversity	Vertebrates	21	21	17	7.79	2	2.29	Crop	Herbaceous	Temperate	Field
WoS4.41	1	Diversity	Vertebrates	21	21	1	1.19	0.4	1.1	Crop	Herbaceous	Temperate	Field
WoS4.41	1	Diversity	Vertebrates	21	21	1.7	0.32	0.1	0.37	Crop	Herbaceous	Temperate	Field
WoS4.41	1	Diversity	Vertebrates	21	21	0.9	0.05	1	0	Crop	Herbaceous	Temperate	Field
WoS4.41	1	Abundance	Vertebrates	21	21	2	1.37	3	6.42	Crop	Herbaceous	Temperate	Field
WoS4.41	1	Diversity	Vertebrates	21	21	0.7	0.6	1.7	4.26	Crop	Herbaceous	Temperate	Field
WoS4.41	1	Diversity	Vertebrates	21	21	0	0.46	0.9	2.8	Crop	Herbaceous	Temperate	Field
WoS4.41	1	Abundance	Vertebrates	21	21	44	32.54	13	30.24	Crop	Herbaceous	Temperate	Field
WoS4.41	1	Diversity	Vertebrates	21	21	14	7.79	2	2.29	Crop	Herbaceous	Temperate	Field
WoS4.41	1	Diversity	Vertebrates	21	21	1	1.19	0.4	1.1	Crop	Herbaceous	Temperate	Field
WoS4.41	1	Diversity	Vertebrates	21	21	1.7	0.32	0.5	0.92	Crop	Herbaceous	Temperate	Field
WoS4.41	1	Diversity	Vertebrates	21	21	0.9	0.05	0.7	0.14	Crop	Herbaceous	Temperate	Field
WoS4.41	1	Abundance	Vertebrates	21	21	2	1.37	2	3.67	Crop	Herbaceous	Temperate	Field
WoS4.41	1	Diversity	Vertebrates	21	21	0.7	0.6	0.3	0.14	Crop	Herbaceous	Temperate	Field
WoS4.41	1	Diversity	Vertebrates	21	21	0	0.46	0	0.09	Crop	Herbaceous	Temperate	Field
WoS4.41	1	Abundance	Vertebrates	21	21	44	32.54	12	28.41	Crop	Herbaceous	Temperate	Field
WoS4.41	1	Diversity	Vertebrates	21	21	17	7.79	3	4.12	Crop	Herbaceous	Temperate	Field
WoS4.41	1	Diversity	Vertebrates	21	21	1	1.19	0.2	0.92	Crop	Herbaceous	Temperate	Field
WoS4.41	1	Diversity	Vertebrates	21	21	1.7	0.32	0.5	1.1	Crop	Herbaceous	Temperate	Field
WoS4.41	1	Diversity	Vertebrates	21	21	0.9	0.05	0.8	0.32	Crop	Herbaceous	Temperate	Field
WoS4.41	1	Abundance	Vertebrates	21	21	2	1.37	3	6.42	Crop	Herbaceous	Temperate	Field
WoS4.41	1	Diversity	Vertebrates	21	21	0.7	0.6	0.6	1.01	Crop	Herbaceous	Temperate	Field
WoS4.41	1	Diversity	Vertebrates	21	21	0	0.46	0.1	0.23	Crop	Herbaceous	Temperate	Field
WoS4.59	1	Diversity	Plants	11685	11685	15	11.11	18	16.3	Crop	Herbaceous	Temperate	Landscape
WoS4.59	1	Diversity	Plants	11685	11685	5	3.7	2	3.7	Crop	Herbaceous	Temperate	Landscape
WoS4.71	1	Abundance	Plants	2	2	37	5.99	26	9.51	Crop	Herbaceous	Temperate	Field
WoS4.71	1	Abundance	Plants	2	2	23	6.55	15	5.59	Crop	Herbaceous	Temperate	Field
WoS4.71	1	Abundance	Plants	2	2	21	6.63	13	5.41	Crop	Herbaceous	Temperate	Field
WoS4.71	1	Abundance	Plants	2	2	39	9.32	24	9.31	Crop	Herbaceous	Temperate	Field
WoS4.71	1	Abundance	Plants	2	2	32	7.97	24	9.87	Crop	Herbaceous	Temperate	Field
WoS4.76	1	Abundance	Invertebrates	3	3	200	28.17	96	7.35	Crop	Woody	Tropical	Landscape
WoS4.84	1	Diversity	Plants	915	915	1	1.5	0.8	3.58	Crop	Woody	Temperate	Field
WoS4.85	1	Diversity	Plants	5581	5581	20.6	52.29	4	22.41	Crop	Woody	Temperate	Field
WoS4.85	1	Diversity	Plants	5581	5581	20.6	52.29	3.8	22.41	Crop	Woody	Temperate	Field
WoS4.85	1	Diversity	Plants	5581	5581	20.6	52.29	10	37.35	Crop	Woody	Temperate	Field
WoS4.85	1	Diversity	Plants	5581	5581	20.6	52.29	4.9	22.41	Crop	Woody	Temperate	Field
WoS4.85	1	Diversity	Plants	5581	5581	20.6	52.29	16.8	37.35	Crop	Woody	Temperate	Field
WoS4.85	1	Diversity	Plants	5581	5581	20.6	52.29	6.7	231.59	Crop	Woody	Temperate	Field
WoS4.85	1	Diversity	Plants	5581	5581	20.6	52.29	9.1	29.88	Crop	Woody	Temperate	Field
WoS4.85	1	Diversity	Plants	5581	5581	20.6	52.29	15.1	149.41	Crop	Woody	Temperate	Field
WoS4.85	1	Diversity	Plants	5581	5581	20.6	52.29	13.5	231.59	Crop	Woody	Temperate	Field
WoS4.85	1	Diversity	Plants	5581	5581	20.6	52.29	14	395.94	Crop	Woody	Temperate	Field
WoS4.85	1	Diversity	Plants	5581	5581	20.6	52.29	7.9	149.41	Crop	Woody	Temperate	Field
WoS4.85	1	Diversity	Plants	5581	5581	20.6	52.29	9.3	7.47	Crop	Woody	Temperate	Field
WoS4.85	1	Diversity	Plants	5581	5581	20.6	52.29	6.7	22.41	Crop	Woody	Temperate	Field
WoS4.85	1	Diversity	Plants	5581	5581	20.6	52.29	9.3	119.53	Crop	Woody	Temperate	Field
WoS4.85	1	Diversity	Plants	5581	5581	20.6	52.29	4.3	22.41	Crop	Woody	Temperate	Field
WoS4.85	1	Diversity	Plants	5581	5581	20.6	52.29	15.8	52.29	Pasture	Woody	Temperate	Field
WoS4.85	1	Diversity	Plants	5581	5581	20.6	52.29	7.2	44.82	Pasture	Woody	Temperate	Field
WoS4.85	1	Diversity	Plants	5581	5581	20.6	52.29	7.5	29.88	Pasture	Woody	Temperate	Field
WoS5.1	1	Abundance	Vertebrates	51	30	15.69	16.14	10.47	18.38	Crop	Herbaceous	Tropical	Field
WoS5.1	1	Diversity	Vertebrates	51	30	4.39	1.82	1.4	1.22	Crop	Herbaceous	Tropical	Field
WoS5.1	1	Diversity	Vertebrates	51	30	1.14	0.44	0.3	0.39	Crop	Herbaceous	Tropical	Field
WoS5.8	1	Diversity	Vertebrates	25	25	10.2	2.3	8.2	2.35	Crop	Herbaceous	Temperate	Field
WoS5.8	1	Diversity	Vertebrates	25	25	25.45	8.3	23.75	15.6	Crop	Herbaceous	Temperate	Landscape
WoS5.25	1	Abundance	Plants	15	15	191	22.96	108	9.18	Crop	Herbaceous	Tropical	Field
WoS5.25	1	Abundance	Plants	15	15	191	22.96	352	23.47	Pasture	NA	Tropical	Field
WoS5.31	1	Abundance	Invertebrates	5	5	25.388	11.04	19.801	15.42	Crop	Herbaceous	Temperate	Field
WoS5.31	1	Diversity	Invertebrates	5	5	2.1	0.38	1.42	0.3	Crop	Herbaceous	Temperate	Field
WoS5.42	1	Diversity	Plants	6	6	1.96	1.38	1.28	0.85	Crop	Herbaceous	Temperate	Landscape
WoS5.71	1	Abundance	Invertebrates	4	4	2.2	0.05	2.15	0.05	Crop	Herbaceous	Temperate	Field
WoS5.71	1	Diversity	Invertebrates	4	4	9.5	1.5	8	6.9	Crop	Herbaceous	Temperate	Field
WoS5.96	1	Diversity	Plants	12	12	5.84	2.18	3.97	1.25	Crop	Herbaceous	Temperate	Field
WoS5.96	1	Diversity	Plants	12	12	5.7	3.81	0.8	0.69	Crop	Herbaceous	Temperate	Field
WoS5.98	1	Abundance	Plants	62	109	1.89	2.76	2.91	8.83	Crop	Herbaceous	Temperate	Landscape
WoS5.98	1	Abundance	Plants	62	109	48.5	18.92	17.25	15.91	Crop	Herbaceous	Temperate	Landscape
WoS6.13	1	Diversity	Plants	9	9	3	1.53	13	2.04	Crop	Woody	Temperate	Field
WoS6.13	1	Diversity	Plants	9	9	4	1.53	14	2.55	Crop	Woody	Temperate	Field
WoS6.13	1	Diversity	Plants	9	9	15	2.55	13	1.02	Crop	Woody	Temperate	Field
WoS6.13	1	Diversity	Plants	9	9	17	2.04	18	3.57	Crop	Woody	Temperate	Field
WoS6.45	-1	Abundance	Vertebrates	15	15	0.28	0.27	0.03	0.04	Crop	Herbaceous	Temperate	Field
WoS6.60	1	Abundance	Invertebrates	3	3	5	9.08	5	7.88	Crop	Herbaceous	Temperate	Landscape
WoS6.62	1	Abundance	Invertebrates	10	10	0.17	0.16	0.07	0.1	Crop	Herbaceous	Tropical	Landscape
WoS6.62	1	Abundance	Invertebrates	10	10	0.26	0.59	0.07	0.1	Crop	Herbaceous	Tropical	Landscape
WoS6.62	1	Abundance	Invertebrates	10	10	0.17	0.16	0.12	0.2	Crop	Herbaceous	Tropical	Landscape
WoS6.62	1	Abundance	Invertebrates	10	10	0.26	0.59	0.12	0.2	Crop	Herbaceous	Tropical	Landscape
WoS6.62	1	Abundance	Invertebrates	10	10	0.17	0.16	0.08	0.13	Crop	Herbaceous	Tropical	Landscape
WoS6.62	1	Abundance	Invertebrates	10	10	0.26	0.59	0.08	0.13	Crop	Herbaceous	Tropical	Landscape
WoS6.62	1	Abundance	Invertebrates	10	10	3.32	5.91	2.62	5.78	Crop	Herbaceous	Tropical	Landscape
WoS6.62	1	Abundance	Invertebrates	10	10	3.32	5.91	3.32	6.86	Crop	Herbaceous	Tropical	Landscape
WoS6.65	1	Diversity	Vertebrates	2	2	6.83	3.98	4.5	1.5	Crop	Herbaceous	Temperate	Field
WoS6.65	1	Diversity	Vertebrates	2	2	6.83	3.98	4.5	2.5	Crop	Herbaceous	Temperate	Field
WoS6.91	1	Diversity	Plants	18	18	3	0	1.5	0.5	Crop	Woody	Tropical	Landscape
WoS6.91	1	Abundance	Plants	18	18	0.495	0.2	0.855	0.09	Crop	Woody	Tropical	Landscape
WoS6.91	1	Diversity	Plants	18	18	3	0	3.5	1	Crop	Woody	Tropical	Landscape
WoS6.91	1	Abundance	Plants	18	18	0.495	0.2	0	0	Crop	Woody	Tropical	Landscape
WoS6.91	1	Diversity	Invertebrates	18	18	1.03	0.48	1.37	0.32	Crop	Woody	Tropical	Landscape
WoS6.91	-1	Diversity	Invertebrates	18	18	0.47	0.2	0.32	0.05	Crop	Woody	Tropical	Landscape
WoS6.91	1	Diversity	Invertebrates	18	18	3.93	2.22	5.5	2.94	Crop	Woody	Tropical	Landscape
WoS6.91	1	Diversity	Invertebrates	18	18	1.03	0.48	0.85	0.29	Crop	Woody	Tropical	Landscape
WoS6.91	-1	Diversity	Invertebrates	18	18	0.47	0.2	0.5	0.16	Crop	Woody	Tropical	Landscape
WoS6.91	1	Diversity	Invertebrates	18	18	3.93	2.22	2.83	0.62	Crop	Woody	Tropical	Landscape
WoS7.2	1	Diversity	Plants	21	21	0.55	0.15	0.42	0.3	Crop	Woody	Temperate	Landscape
WoS7.2	1	Diversity	Plants	21	21	0.5	0.22	0.38	0.26	Crop	Woody	Temperate	Landscape
WoS7.2	1	Diversity	Plants	21	21	0.9	0.07	0.75	0.19	Crop	Woody	Temperate	Landscape
WoS7.2	1	Diversity	Plants	21	21	0.3	0.11	0.08	0.16	Crop	Woody	Temperate	Landscape
WoS7.5	1	Abundance	Invertebrates	10	10	16	6.32	6	6.32	Crop	Herbaceous	Temperate	Field
WoS7.5	1	Abundance	Invertebrates	10	10	12	6.32	2	3.16	Crop	Herbaceous	Temperate	Field
WoS7.5	1	Abundance	Invertebrates	10	10	41	1.58	3	3.16	Crop	Herbaceous	Temperate	Field
WoS7.5	1	Abundance	Invertebrates	10	10	21	3.16	1	1.58	Crop	Herbaceous	Temperate	Field
WoS7.5	1	Diversity	Invertebrates	10	10	3	1.58	2	1.58	Crop	Herbaceous	Temperate	Field
WoS7.5	1	Diversity	Invertebrates	10	10	3.5	1.58	0.5	1.58	Crop	Herbaceous	Temperate	Field
WoS7.5	1	Diversity	Invertebrates	10	10	6	3.16	2.5	3.16	Crop	Herbaceous	Temperate	Field
WoS7.5	1	Diversity	Invertebrates	10	10	5.5	3.16	2	3.16	Crop	Herbaceous	Temperate	Field
WoS7.5	1	Diversity	Invertebrates	10	10	0.6	0.79	0.75	0.32	Crop	Herbaceous	Temperate	Field
WoS7.5	1	Diversity	Invertebrates	10	10	0.8	0.79	0.25	0.95	Crop	Herbaceous	Temperate	Field
WoS7.5	1	Diversity	Invertebrates	10	10	0.78	0.06	0.7	0.63	Crop	Herbaceous	Temperate	Field
WoS7.5	1	Diversity	Invertebrates	10	10	0.9	0.03	0.5	0.95	Crop	Herbaceous	Temperate	Field
WoS7.47	1	Abundance	Vertebrates	3	3	0.01	0.02	0.003	0	Crop	Herbaceous	Temperate	Field
WoS7.47	1	Abundance	Vertebrates	3	3	0.01	0.01	0.00085	0	Crop	Herbaceous	Temperate	Field
WoS7.47	1	Abundance	Vertebrates	3	3	0.005	0.01	0.00325	0.01	Crop	Herbaceous	Temperate	Field
WoS7.47	1	Abundance	Vertebrates	3	3	0.018	0.05	0	0	Crop	Herbaceous	Temperate	Field
WoS7.47	1	Abundance	Vertebrates	3	3	0.004	0.01	0.003	0.01	Crop	Herbaceous	Temperate	Field
WoS7.47	1	Abundance	Vertebrates	3	3	0.001	0	0.003	0	Crop	Herbaceous	Temperate	Field
WoS7.47	-1	Abundance	Vertebrates	3	3	27.2	6.06	49.85	5.28	Crop	Herbaceous	Temperate	Field
WoS7.47	-1	Abundance	Vertebrates	3	3	29.3	9.7	64.45	9.09	Crop	Herbaceous	Temperate	Field
WoS7.47	-1	Abundance	Vertebrates	3	3	31.5	10.57	92.6	14.03	Crop	Herbaceous	Temperate	Field
WoS7.48	1	Abundance	Invertebrates	45	45	11	38.51	8	25.65	Crop	Herbaceous	Temperate	Field
WoS7.48	1	Abundance	Invertebrates	45	45	11	38.51	8	15.44	Crop	Herbaceous	Temperate	Field
WoS7.48	1	Abundance	Invertebrates	45	45	11	38.51	8	16.8	Crop	Herbaceous	Temperate	Field
WoS7.48	1	Abundance	Invertebrates	45	45	0.35	0.08	0.25	0.08	Crop	Herbaceous	Temperate	Field
WoS7.48	1	Abundance	Invertebrates	45	45	0.35	0.08	0.375	0.07	Crop	Herbaceous	Temperate	Field
WoS7.48	1	Abundance	Invertebrates	45	45	0.35	0.08	0.34	0.04	Crop	Herbaceous	Temperate	Field
WoS7.48	1	Abundance	Invertebrates	45	45	0.285	0.03	0.615	0.13	Crop	Herbaceous	Temperate	Field
WoS7.48	1	Abundance	Invertebrates	45	45	0.285	0.03	0.39	0.09	Crop	Herbaceous	Temperate	Field
WoS7.48	1	Abundance	Invertebrates	45	45	0.285	0.03	0.36	0.03	Crop	Herbaceous	Temperate	Field
WoS7.48	1	Abundance	Invertebrates	45	45	0.31	0.02	0.125	0.05	Crop	Herbaceous	Temperate	Field
WoS7.48	1	Abundance	Invertebrates	45	45	0.31	0.02	0.225	0.03	Crop	Herbaceous	Temperate	Field
WoS7.48	1	Abundance	Invertebrates	45	45	0.31	0.02	0.285	0.07	Crop	Herbaceous	Temperate	Field
WoS7.48	1	Abundance	Invertebrates	45	45	0.02	0.01	0.01	0	Crop	Herbaceous	Temperate	Field
WoS7.48	1	Abundance	Invertebrates	45	45	0.015	0.01	0	0	Crop	Herbaceous	Temperate	Field
WoS7.48	1	Abundance	Invertebrates	45	45	0.015	0.01	0.005	0.01	Crop	Herbaceous	Temperate	Field
WoS7.48	-1	Diversity	Invertebrates	45	45	0.81	0.01	0.69	0.1	Crop	Herbaceous	Temperate	Field
WoS7.48	-1	Diversity	Invertebrates	45	45	0.81	0.01	0.815	0.02	Crop	Herbaceous	Temperate	Field
WoS7.48	-1	Diversity	Invertebrates	45	45	0.81	0.01	0.83	0	Crop	Herbaceous	Temperate	Field
WoS7.48	1	Diversity	Invertebrates	45	45	0.22	0	0.23	0.01	Crop	Herbaceous	Temperate	Field
WoS7.48	1	Diversity	Invertebrates	45	45	0.22	0	0.245	0.01	Crop	Herbaceous	Temperate	Field
WoS7.48	1	Diversity	Invertebrates	45	45	0.22	0	0.23	0.01	Crop	Herbaceous	Temperate	Field
WoS7.48	1	Abundance	Invertebrates	45	45	186	25.4	329	1.07	Crop	Herbaceous	Temperate	Field
WoS7.48	1	Abundance	Invertebrates	45	45	186	25.4	355	36.94	Crop	Herbaceous	Temperate	Field
WoS7.48	1	Abundance	Invertebrates	45	45	186	25.4	353	63.07	Crop	Herbaceous	Temperate	Field
WoS7.48	1	Diversity	Invertebrates	45	45	16.67	0.34	13.17	0.5	Crop	Herbaceous	Temperate	Field
WoS7.48	1	Diversity	Invertebrates	45	45	16.67	0.34	11.665	0.34	Crop	Herbaceous	Temperate	Field
WoS7.48	1	Diversity	Invertebrates	45	45	16.67	0.34	15.17	1.5	Crop	Herbaceous	Temperate	Field
WoS7.54	1	Abundance	Invertebrates	18	18	16	21.21	5	10.61	Crop	Herbaceous	Temperate	Field
WoS7.73	1	Abundance	Plants	9	9	42.94	1.38	67.24	2.4	Crop	Herbaceous	Tropical	Field
WoS7.79	1	Diversity	Invertebrates	9	9	14	1	15	1	Pasture	NA	Temperate	Field
WoS7.93	1	Diversity	Plants	10	10	0.13	0.08	0.08	0.05	Crop	Woody	Temperate	Landscape
WoS7.94	1	Abundance	Plants	18	18	91.74	12.9	16.89	15.53	Crop	Herbaceous	Temperate	Field
WoS7.94	1	Abundance	Plants	18	18	3.67	8.95	0	0	Crop	Herbaceous	Temperate	Field
WoS7.94	1	Abundance	Plants	18	18	87.41	20.83	0	0	Crop	Herbaceous	Temperate	Field
WoS7.94	1	Abundance	Plants	18	18	91.74	12.9	1.22	2.76	Crop	Herbaceous	Temperate	Field
WoS7.94	1	Abundance	Plants	18	18	3.67	8.95	57.11	8.82	Crop	Herbaceous	Temperate	Field
WoS7.94	1	Abundance	Plants	18	18	87.41	20.83	0	0	Crop	Herbaceous	Temperate	Field
WoS7.95	1	Diversity	Plants	42	42	0.25	0.05	0.03	0.01	Crop	Herbaceous	Temperate	Landscape
WoS7.95	-1	Diversity	Plants	42	42	0.325	0.03	0.16	0.1	Crop	Herbaceous	Temperate	Landscape
WoS7.95	1	Diversity	Plants	42	42	4	1.5	3	0.83	Crop	Herbaceous	Temperate	Landscape
WoS7.95	-1	Diversity	Plants	42	42	3	1.2	7	0.5	Crop	Herbaceous	Temperate	Landscape
WoS7.95	1	Diversity	Invertebrates	42	42	0.15	0.15	0.18	0.14	Crop	Herbaceous	Temperate	Landscape
WoS7.95	1	Diversity	Invertebrates	42	42	2	0.5	2	1.12	Crop	Herbaceous	Temperate	Landscape
WoS7.95	1	Diversity	Invertebrates	42	42	0.22	0.01	0.24	0.01	Crop	Herbaceous	Temperate	Landscape
WoS7.95	1	Diversity	Invertebrates	42	42	15	1.1	12	1.5	Crop	Herbaceous	Temperate	Landscape
WoS8.5	1	Abundance	Invertebrates	18	18	2.67	0.47	0.17	0.05	Crop	Herbaceous	Temperate	Field
WoS8.5	1	Abundance	Invertebrates	18	18	21.5	3.5	7.5	3.5	Crop	Herbaceous	Temperate	Field
WoS8.19	1	Diversity	Plants	3	3	20	8.19	19.67	2.51	Crop	Woody	Temperate	Landscape
WoS8.19	1	Diversity	Plants	3	3	2.55	0.55	0.79	0.19	Crop	Woody	Temperate	Landscape
WoS8.19	1	Diversity	Plants	3	3	12.33	9.72	18.67	2.51	Crop	Woody	Temperate	Landscape
WoS8.19	1	Diversity	Plants	3	3	7	3.6	0	0	Crop	Woody	Temperate	Landscape
WoS8.19	1	Diversity	Plants	3	3	0.67	0.57	1	0	Crop	Woody	Temperate	Landscape
WoS8.19	1	Diversity	Plants	3	3	1.86	1.58	2.79	0.48	Crop	Woody	Temperate	Landscape
WoS8.19	1	Diversity	Plants	3	3	1.98	0.64	0	0	Crop	Woody	Temperate	Landscape
WoS8.19	1	Abundance	Vertebrates	3	3	15	2.55	5	2.55	Crop	Woody	Temperate	Landscape
WoS8.19	1	Abundance	Vertebrates	3	3	2	0.26	1	0.26	Crop	Woody	Temperate	Landscape
WoS8.25	1	Abundance	Plants	50	50	269.69	53.49	221.35	69.14	Crop	Woody	Tropical	Field
WoS8.27	1	Abundance	Vertebrates	4	4	20.85	1.85	31.45	21.65	Crop	Herbaceous	Temperate	Landscape
WoS8.27	1	Diversity	Vertebrates	4	4	2.7	0.4	2	0.9	Crop	Herbaceous	Temperate	Landscape
WoS8.27	1	Diversity	Vertebrates	4	4	0.345	0.1	0.08	0.02	Crop	Herbaceous	Temperate	Landscape
WoS8.38	1	Diversity	Invertebrates	3	3	228	5	87	9.95	Crop	Herbaceous	Temperate	Field
WoS8.49	1	Abundance	Invertebrates	3	3	1720	613.15	901	268.47	Crop	Herbaceous	Temperate	Field
WoS8.49	1	Abundance	Invertebrates	3	3	829	247.68	1181	387.98	Crop	Herbaceous	Temperate	Field
WoS8.58	1	Abundance	Vertebrates	2	2	4.53	0.94	3.49	1.55	Pasture	NA	Temperate	Landscape
WoS8.58	1	Abundance	Vertebrates	2	2	4.53	0.94	3.58	1.25	Pasture	NA	Temperate	Landscape
WoS8.65	1	Abundance	Invertebrates	10	10	30	15.81	36	3.7	Crop	Herbaceous	Temperate	Landscape
WoS8.65	1	Abundance	Invertebrates	10	10	75	15.81	263	43.5	Crop	Herbaceous	Temperate	Landscape
WoS8.65	1	Abundance	Invertebrates	10	10	30	15.81	287	167	Crop	Herbaceous	Temperate	Landscape
WoS8.65	1	Abundance	Invertebrates	10	10	110	31.62	34	23.39	Crop	Herbaceous	Temperate	Landscape
WoS8.65	1	Diversity	Invertebrates	10	10	9	3.16	19	2.13	Crop	Herbaceous	Temperate	Landscape
WoS8.65	1	Diversity	Invertebrates	10	10	12	0.79	91.95	89.97	Crop	Herbaceous	Temperate	Landscape
WoS8.65	1	Diversity	Invertebrates	10	10	7	1.58	7.75	0.79	Crop	Herbaceous	Temperate	Landscape
WoS8.65	1	Diversity	Invertebrates	10	10	8	0.79	7.5	1.58	Crop	Herbaceous	Temperate	Landscape
WoS8.65	1	Abundance	Invertebrates	10	10	23	6.32	40	15.81	Crop	Herbaceous	Temperate	Landscape
WoS8.65	1	Abundance	Invertebrates	10	10	75	15.81	82	9.49	Crop	Herbaceous	Temperate	Landscape
WoS8.65	1	Abundance	Invertebrates	10	10	30	15.81	40	31.62	Crop	Herbaceous	Temperate	Landscape
WoS8.65	1	Abundance	Invertebrates	10	10	105	47.43	100	47.43	Crop	Herbaceous	Temperate	Landscape
WoS8.65	1	Diversity	Invertebrates	10	10	9	6.32	8	3.16	Crop	Herbaceous	Temperate	Landscape
WoS8.65	1	Diversity	Invertebrates	10	10	11.5	1.58	13	1.58	Crop	Herbaceous	Temperate	Landscape
WoS8.65	1	Diversity	Invertebrates	10	10	7	3.16	7	3.16	Crop	Herbaceous	Temperate	Landscape
WoS8.65	1	Diversity	Invertebrates	10	10	7.5	1.58	9	1.58	Crop	Herbaceous	Temperate	Landscape
WoS8.69	1	Abundance	Vertebrates	3	3	263	143.5	9.5	6.5	Crop	Woody	Tropical	Landscape
WoS8.69	1	Abundance	Vertebrates	3	3	263	143.5	375	112	Crop	Herbaceous	Tropical	Landscape
WoS8.69	1	Abundance	Vertebrates	3	3	263	143.5	7.5	0.5	Crop	Herbaceous	Tropical	Landscape
WoS8.69	1	Abundance	Vertebrates	3	3	263	143.5	263	43.5	Pasture	NA	Tropical	Landscape
WoS8.73	1	Abundance	Vertebrates	110	110	60.5	7.5	30.5	21.5	Crop	Herbaceous	Temperate	Landscape
WoS8.73	1	Abundance	Vertebrates	110	110	2.4	0.89	0.81	0.55	Crop	Herbaceous	Temperate	Landscape
WoS8.73	1	Abundance	Vertebrates	110	110	20.5	3.5	5.5	0.5	Crop	Herbaceous	Temperate	Landscape
WoS8.98	-1	Abundance	Plants	31	31	95	27.84	55	27.84	Crop	Woody	Temperate	Field
WoS8.98	-1	Diversity	Plants	31	31	5	1.39	3.25	1.39	Crop	Woody	Temperate	Field
WoS9.4	1	Abundance	Invertebrates	4	31	153	36.4	151	180.82	Crop	Herbaceous	Tropical	Field
WoS9.4	1	Diversity	Invertebrates	4	31	22	2.96	21	2.78	Crop	Herbaceous	Tropical	Field
WoS9.4	1	Abundance	Invertebrates	4	31	155	51.96	145	83.52	Crop	Herbaceous	Tropical	Field
WoS9.4	1	Diversity	Invertebrates	4	31	19	4.77	18	11.81	Crop	Herbaceous	Tropical	Field
WoS10.8	1	Abundance	Vertebrates	24	24	3.91	4.48	0.85	2.9	Crop	Woody	Temperate	Landscape
WoS10.66	1	Diversity	Vertebrates	103	103	11.5	3.5	4.5	0.5	Crop	Woody	Temperate	Landscape
WoS10.66	1	Diversity	Vertebrates	103	103	6	0.25	4	0.5	Crop	Woody	Temperate	Landscape
WoS10.66	1	Abundance	Vertebrates	103	103	45	15	10.2	0	Crop	Woody	Temperate	Landscape
WoS10.71	1	Abundance	Invertebrates	12	12	75	75	25	25	Crop	Herbaceous	Temperate	Field
WoS10.71	1	Abundance	Invertebrates	12	12	75	55.56	75	55.56	Pasture	NA	Temperate	Field
WoS10.78	-1	Abundance	Invertebrates	16	16	11.15	3.95	7.25	0.05	Crop	Herbaceous	Tropical	Field
WoS10.78	-1	Abundance	Invertebrates	16	16	3.44	0.37	3.06	0.37	Crop	Herbaceous	Tropical	Field
WoS10.78	-1	Abundance	Invertebrates	16	16	6.92	3.75	4.5	0.78	Crop	Herbaceous	Tropical	Field
WoS10.78	-1	Abundance	Invertebrates	16	16	1.75	1.71	3.04	4.09	Crop	Herbaceous	Tropical	Field
WoS10.78	-1	Abundance	Invertebrates	16	16	1.33	0.37	1.54	0.92	Crop	Herbaceous	Tropical	Field
WoS10.88	1	Abundance	Invertebrates	11	11	216	14.26	492	101.16	Crop	Woody	Temperate	Field
WoS10.96	1	Diversity	Invertebrates	10	10	12.4	6.2	10.75	5.4	Crop	Herbaceous	Tropical	Field
WoS10.96	1	Diversity	Invertebrates	10	10	5.44	2.01	4.89	2.33	Crop	Herbaceous	Tropical	Field
WoS10.96	1	Diversity	Invertebrates	10	10	4	1.68	3.5	1.48	Crop	Herbaceous	Tropical	Field
WoS10.104	1	Abundance	Vertebrates	56	56	7.29	15.41	3.37	15.13	Crop	Herbaceous	Temperate	Field
WoS10.105	1	Diversity	Invertebrates	65	65	9.5	12.09	4	8.06	Crop	Herbaceous	Temperate	Landscape
WoS10.105	1	Abundance	Invertebrates	65	65	2.6	8.22	1.325	18.12	Crop	Herbaceous	Temperate	Landscape
WoS10.123	1	Diversity	Invertebrates	29	29	0.115	0.15	0	0	Crop	Woody	Temperate	Field
WoS10.123	1	Diversity	Invertebrates	29	29	0.082	0.13	0	0	Crop	Woody	Temperate	Field
WoS10.123	1	Diversity	Plants	29	29	0.4	1.08	0.4	2.15	Crop	Woody	Temperate	Field
WoS10.123	1	Diversity	Plants	29	29	0.4	1.08	0.3	1.62	Crop	Woody	Temperate	Field
WoS10.123	1	Diversity	Plants	29	29	0.5	0.54	0.4	2.15	Crop	Woody	Temperate	Field
WoS10.123	1	Diversity	Plants	29	29	0.5	0.54	0.3	1.62	Crop	Woody	Temperate	Field
WoS10.137	1	Diversity	Vertebrates	218	218	9.25	1.48	5.75	1.79	Crop	Woody	Temperate	Field
WoS10.137	1	Diversity	Vertebrates	218	218	7	0	4.5	0.5	Crop	Herbaceous	Temperate	Field
WoS10.146	1	Abundance	Invertebrates	230	230	1	15.17	2.3	19.72	Crop	Woody	Temperate	Landscape
