# Supplementary material for: Contributions of Hedgerows to People: A Global Meta-Analysis
Source: Frontiers journal article supplement (doi:10.3389/fcosc.2021.789612), 2021-12-22
Supplement: Table_3.XLSX [file Table_3.XLSX]

## Sheet: Hoja1
Identifier	New.Response	New.sign	New.Taxa	nHedgerow	nControl	Hedgerow.Value	Hedgerow.SD	Natural.habitat.Value	Natural.habitat.SD	Natural.habitat.type	Climate.type	Spatial.Scale.Focus
WoS1.40	Abundance	1	Vertebrates	54	54	31	3.67	37	5.51	Grasslands/Meadow	Temperate	Field
WoS1.40	Abundance	1	Vertebrates	54	54	33	3.67	37	5.51	Grasslands/Meadow	Temperate	Field
WoS1.40	Abundance	1	Vertebrates	54	54	6.8	5.51	2.8	1.84	Grasslands/Meadow	Temperate	Field
WoS1.40	Abundance	1	Vertebrates	54	54	5.5	3.67	2.8	2.42	Grasslands/Meadow	Temperate	Field
WoS1.40	Abundance	-1	Vertebrates	54	54	0.035	0.02	0.005	0	Grasslands/Meadow	Temperate	Field
WoS1.40	Abundance	-1	Vertebrates	54	54	0.07	0.04	0.018	0.01	Grasslands/Meadow	Temperate	Field
WoS1.40	Abundance	-1	Vertebrates	54	54	0.07	0.02	0.018	0.01	Grasslands/Meadow	Temperate	Field
WoS1.65	Abundance	1	Invertebrates	4	4	297.1	13.8	300.1	8	Forest/Woodland	Temperate	Field
WoS1.65	Abundance	1	Invertebrates	4	4	186.6	9	180.9	4.2	Forest/Woodland	Temperate	Field
WoS2.1	Abundance	1	Invertebrates	9	9	11.9	23.7	7.9	5.52	Forest/Woodland	Temperate	Field
WoS2.20	Diversity	1	Invertebrates	2	2	45.12	6.3	44.55	9.41	Forest/Woodland	Temperate	Field
WoS2.25	Abundance	-1	Invertebrates	40	40	32	94.87	37	126.49	Forest/Woodland	Temperate	Field
WoS2.25	Abundance	-1	Invertebrates	40	40	8	31.62	12	31.62	Forest/Woodland	Temperate	Field
WoS2.25	Abundance	-1	Invertebrates	40	40	10	44.27	14	44.27	Forest/Woodland	Temperate	Field
WoS2.27	Abundance	1	Vertebrates	14	40	1.34	1.8	3.44	4.87	Grasslands/Meadow	Temperate	Landscape
WoS2.45	Abundance	1	Vertebrates	12	12	5	37.04	95	66.67	Forest/Woodland	Tropical	Landscape
WoS2.45	Diversity	1	Invertebrates	12	12	8	7.41	9	4.44	Forest/Woodland	Tropical	Landscape
WoS2.45	Abundance	1	Invertebrates	12	12	3	2.22	15	25.93	Forest/Woodland	Tropical	Landscape
WoS2.71	Abundance	1	Plants	4	4	4.75	1	3.25	1	Forest/Woodland	Temperate	Field
WoS2.71	Abundance	1	Plants	4	4	80	30	70	30	Forest/Woodland	Temperate	Field
WoS2.71	Abundance	1	Plants	4	4	2.25	0.2	2.5	0.8	Forest/Woodland	Temperate	Field
WoS2.71	Abundance	1	Plants	4	4	2.25	6	3.75	8	Forest/Woodland	Temperate	Field
WoS2.71	Abundance	1	Plants	4	4	10	2	7	6	Forest/Woodland	Temperate	Field
WoS2.71	Abundance	1	Plants	4	4	4.25	0.4	3	0.4	Forest/Woodland	Temperate	Field
WoS2.71	Abundance	1	Plants	4	4	15	0.4	12	0.4	Forest/Woodland	Temperate	Field
WoS2.71	Abundance	1	Plants	4	4	17	2	19	6	Forest/Woodland	Temperate	Field
WoS2.71	Abundance	1	Plants	4	4	0.14	0.04	0.23	0.04	Forest/Woodland	Temperate	Field
WoS3.11	Diversity	1	Plants	10	10	10.5	1.58	7.3	1.58	Forest/Woodland	Temperate	Landscape
WoS3.11	Diversity	1	Plants	10	10	20.3	1.58	11.1	1.58	Forest/Woodland	Temperate	Landscape
WoS3.20	Abundance	1	Plants	58	58	80	15	70	10	Forest/Woodland	Temperate	Field
WoS3.20	Abundance	1	Plants	58	58	80	15	75	7	Forest/Woodland	Temperate	Field
WoS3.20	Abundance	1	Plants	58	58	83	40	130	40	Forest/Woodland	Temperate	Field
WoS3.20	Abundance	1	Plants	58	58	83	40	115	45	Forest/Woodland	Temperate	Field
WoS3.20	Abundance	1	Plants	58	58	50	30	70	50	Forest/Woodland	Temperate	Field
WoS3.20	Abundance	1	Plants	58	58	50	30	35	10	Forest/Woodland	Temperate	Field
WoS3.20	Abundance	1	Plants	58	58	70	60	10	5	Forest/Woodland	Temperate	Field
WoS3.20	Abundance	1	Plants	58	58	70	60	20	10	Forest/Woodland	Temperate	Field
WoS3.20	Abundance	1	Plants	58	58	10	20	30	30	Forest/Woodland	Temperate	Field
WoS3.20	Abundance	-1	Plants	58	58	10	20	5	10	Forest/Woodland	Temperate	Field
WoS3.20	Abundance	1	Plants	58	58	28	20	32	25	Forest/Woodland	Temperate	Field
WoS3.20	Abundance	1	Plants	58	58	28	20	5	10	Forest/Woodland	Temperate	Field
WoS3.20	Abundance	1	Plants	58	58	5	10	8	15	Forest/Woodland	Temperate	Field
WoS3.20	Abundance	1	Plants	58	58	5	10	35	25	Forest/Woodland	Temperate	Field
WoS3.20	Abundance	1	Plants	58	58	2	2	5	15	Forest/Woodland	Temperate	Field
WoS3.20	Abundance	1	Plants	58	58	2	2	2	1	Forest/Woodland	Temperate	Field
WoS3.20	Abundance	1	Plants	58	58	25	30	40	15	Forest/Woodland	Temperate	Field
WoS3.20	Abundance	1	Plants	58	58	25	30	15	10	Forest/Woodland	Temperate	Field
WoS3.20	Abundance	1	Plants	58	58	5	10	10	15	Forest/Woodland	Temperate	Field
WoS3.20	Abundance	1	Plants	58	58	5	10	40	30	Forest/Woodland	Temperate	Field
WoS3.25	Abundance	1	Plants	20	20	13826	31023.2	1210	2419.43	Forest/Woodland	Temperate	Field
WoS3.25	Abundance	1	Plants	17	17	1892	3108.82	465	898.84	Forest/Woodland	Temperate	Field
WoS3.25	Abundance	1	Plants	19	19	15401	13931	1833	2297.14	Forest/Woodland	Temperate	Field
WoS3.25	Abundance	1	Plants	20	20	33663	5125.07	1310	3635.85	Forest/Woodland	Temperate	Field
WoS3.53	Diversity	1	Plants	45	45	29	16.1	58	21.47	Forest/Woodland	Temperate	Field
WoS3.53	Diversity	1	Plants	45	45	19	10.73	25	20.8	Forest/Woodland	Temperate	Field
WoS3.53	Diversity	-1	Plants	45	45	5	3.35	3.6	6.04	Forest/Woodland	Temperate	Field
WoS3.53	Diversity	1	Plants	45	45	8	6.04	20.4	12.07	Forest/Woodland	Temperate	Field
WoS3.53	Abundance	1	Plants	45	45	42	20.12	84.3	24.15	Forest/Woodland	Temperate	Field
WoS3.53	Diversity	-1	Plants	45	45	10	6.71	2.8	6.04	Forest/Woodland	Temperate	Field
WoS3.53	Abundance	-1	Plants	45	45	51	23.48	9.3	15.43	Forest/Woodland	Temperate	Field
WoS3.53	Diversity	-1	Plants	45	45	9.5	6.04	2.4	4.7	Forest/Woodland	Temperate	Field
WoS3.53	Abundance	-1	Plants	45	45	51.3	22.81	8.2	11.4	Forest/Woodland	Temperate	Field
WoS3.53	Abundance	-1	Plants	45	45	34.7	21.47	5.7	6.71	Forest/Woodland	Temperate	Field
WoS3.53	Diversity	1	Plants	45	45	3.4	3.35	0.5	1.34	Forest/Woodland	Temperate	Field
WoS3.53	Diversity	-1	Plants	45	45	6.1	4.7	1.9	4.02	Forest/Woodland	Temperate	Field
WoS3.53	Diversity	-1	Plants	45	45	4.2	2.68	1.9	3.35	Forest/Woodland	Temperate	Field
WoS3.53	Diversity	-1	Plants	45	45	22.4	13.42	6.3	10.73	Forest/Woodland	Temperate	Field
WoS3.53	Diversity	-1	Plants	45	45	15.4	12.07	4.8	4.7	Forest/Woodland	Temperate	Field
WoS3.53	Diversity	-1	Plants	45	45	1.8	1.34	0.5	1.34	Forest/Woodland	Temperate	Field
WoS3.53	Diversity	-1	Plants	45	45	2.4	2.68	1.4	3.35	Forest/Woodland	Temperate	Field
WoS3.53	Diversity	-1	Plants	45	45	5.3	4.02	0.5	2.01	Forest/Woodland	Temperate	Field
WoS3.53	Abundance	-1	Plants	45	45	28.9	19.45	1.9	6.71	Forest/Woodland	Temperate	Field
WoS3.53	Abundance	-1	Plants	45	45	19.3	13.42	0.9	4.02	Forest/Woodland	Temperate	Field
WoS3.53	Diversity	-1	Plants	45	45	1.6	2.68	0	0	Forest/Woodland	Temperate	Field
WoS3.53	Diversity	-1	Plants	45	45	3.7	3.35	0.5	2.01	Forest/Woodland	Temperate	Field
WoS3.57	Abundance	1	Plants	8	8	62.28	7.01	45.12	24.78	Forest/Woodland	Temperate	Landscape
WoS3.57	Abundance	1	Plants	8	8	4.52	1.19	5.05	0.96	Forest/Woodland	Temperate	Landscape
WoS3.57	Abundance	1	Plants	8	8	6.56	1.64	6.83	0.57	Forest/Woodland	Temperate	Landscape
WoS3.57	Abundance	1	Plants	8	8	3.87	1.56	4.39	1.5	Forest/Woodland	Temperate	Landscape
WoS3.57	Abundance	1	Plants	8	8	4.53	1.1	4.3	1.64	Forest/Woodland	Temperate	Landscape
WoS3.57	Abundance	1	Plants	8	8	4.39	1.58	2.37	1.02	Forest/Woodland	Temperate	Landscape
WoS3.57	Abundance	1	Plants	8	8	6.68	1.27	7.45	0.99	Forest/Woodland	Temperate	Landscape
WoS3.57	Abundance	1	Plants	8	8	0.36	0.2	0.28	0.11	Forest/Woodland	Temperate	Landscape
WoS3.57	Abundance	1	Plants	8	8	1.87	0.28	2.11	0.54	Forest/Woodland	Temperate	Landscape
WoS3.57	Abundance	1	Plants	8	8	1.93	0.31	2.32	0.59	Forest/Woodland	Temperate	Landscape
WoS3.57	Abundance	1	Plants	8	8	0.88	0.25	1	0.65	Forest/Woodland	Temperate	Landscape
WoS3.57	Diversity	1	Plants	8	8	3.62	0.06	2.58	0.51	Forest/Woodland	Temperate	Landscape
WoS3.57	Diversity	1	Plants	8	8	4.15	0.06	3.12	0.11	Forest/Woodland	Temperate	Landscape
WoS3.57	Diversity	1	Plants	8	8	3.82	0.17	2.82	0.31	Forest/Woodland	Temperate	Landscape
WoS3.60	Abundance	1	Invertebrates	18	18	0.02	0.13	0.04	0.16	Grasslands/Meadow	Temperate	Landscape
WoS3.60	Abundance	1	Invertebrates	18	18	0.05	0.07	0.04	0.01	Grasslands/Meadow	Temperate	Landscape
WoS3.60	Abundance	1	Invertebrates	18	18	0.1	0.33	0.04	0.01	Grasslands/Meadow	Temperate	Landscape
WoS3.60	Abundance	1	Vertebrates	18	18	1	0.74	3	0.19	Grasslands/Meadow	Temperate	Landscape
WoS3.60	Abundance	1	Vertebrates	18	18	2	5.93	3	1.48	Grasslands/Meadow	Temperate	Landscape
WoS3.60	Abundance	1	Vertebrates	18	18	1	0.74	1	0.37	Grasslands/Meadow	Temperate	Landscape
WoS3.60	Abundance	1	Vertebrates	18	18	2	4.44	1	0.37	Grasslands/Meadow	Temperate	Landscape
WoS3.63	Diversity	1	Invertebrates	5	5	14.23	2.03	12.17	1.99	Forest/Woodland	Temperate	Field
WoS3.63	Abundance	1	Plants	5	5	21	20.37	33.5	19.26	Forest/Woodland	Temperate	Field
WoS3.63	Abundance	1	Plants	5	5	73	40	25.5	5.56	Forest/Woodland	Temperate	Field
WoS3.63	Abundance	1	Plants	5	5	15.5	32.59	57.5	21.48	Forest/Woodland	Temperate	Field
WoS3.64	Diversity	1	Vertebrates	33	33	16.7	5.12	21.2	2.14	Forest/Woodland	Temperate	Landscape
WoS4.7	Abundance	1	Vertebrates	12	12	71	1.73	65	1.73	Forest/Woodland	Temperate	Landscape
WoS4.7	Abundance	1	Vertebrates	12	12	71	1.73	65	1.73	Forest/Woodland	Temperate	Landscape
WoS4.7	Abundance	1	Vertebrates	12	12	42.5	1.73	35	3.46	Forest/Woodland	Temperate	Landscape
WoS4.7	Abundance	1	Vertebrates	12	12	28	0.87	25.75	0.87	Forest/Woodland	Temperate	Landscape
WoS4.7	Abundance	1	Vertebrates	12	12	16.25	1.73	14.5	0.87	Forest/Woodland	Temperate	Landscape
WoS4.52	Abundance	1	Vertebrates	8	8	6.5	3.96	0.5	1.13	Forest/Woodland	Temperate	Field
WoS4.57	Abundance	1	Invertebrates	6	6	30	24.49	70	24.49	Grasslands/Meadow	Temperate	Landscape
WoS4.57	Abundance	1	Invertebrates	6	6	58	36.74	60	24.49	Grasslands/Meadow	Temperate	Landscape
WoS4.67	Diversity	1	Plants	88	88	8.92	0.92	8.73	1.17	Forest/Woodland	Temperate	Field
WoS4.67	Diversity	1	Plants	88	88	1.89	0.11	1.88	0.14	Forest/Woodland	Temperate	Field
WoS4.67	Abundance	1	Plants	88	88	77.18	3.64	55.45	6.82	Forest/Woodland	Temperate	Field
WoS4.67	Abundance	1	Plants	88	88	51	6.26	38.43	5.29	Forest/Woodland	Temperate	Field
WoS4.67	Diversity	1	Plants	88	88	8.16	0.55	6.91	0.62	Forest/Woodland	Temperate	Field
WoS4.67	Diversity	1	Plants	88	88	1.75	0.08	1.53	0.12	Forest/Woodland	Temperate	Field
WoS4.67	Abundance	1	Plants	88	88	68.13	3.72	55.94	3.9	Forest/Woodland	Temperate	Field
WoS4.67	Abundance	1	Plants	88	88	55	3.94	41.81	4.04	Forest/Woodland	Temperate	Field
WoS4.67	Abundance	-1	Plants	88	88	17.05	4.19	13.9	3.31	Forest/Woodland	Temperate	Field
WoS4.67	Abundance	1	Plants	88	88	9.25	7.14	6.15	5.49	Forest/Woodland	Temperate	Field
WoS4.67	Abundance	1	Plants	88	88	5.475	1.8	3.1	2.57	Forest/Woodland	Temperate	Field
WoS4.67	Abundance	1	Plants	88	88	67.425	7.12	74.825	8.21	Forest/Woodland	Temperate	Field
WoS4.67	Abundance	1	Plants	88	88	17.825	2.92	16.0719	3.4	Forest/Woodland	Temperate	Field
WoS4.67	Abundance	1	Plants	88	88	37.45	12.67	42.05	12.33	Forest/Woodland	Temperate	Field
WoS4.67	Abundance	-1	Plants	88	99	44.1	12.16	38.775	13.6	Forest/Woodland	Temperate	Field
WoS4.67	Abundance	1	Plants	88	88	18.5	3.23	19.175	2.55	Forest/Woodland	Temperate	Field
WoS4.67	Abundance	-1	Plants	88	88	18.6	5.88	11.925	3	Forest/Woodland	Temperate	Field
WoS4.67	Abundance	1	Plants	88	88	14.825	18.04	11	14.45	Forest/Woodland	Temperate	Field
WoS4.67	Abundance	1	Plants	88	88	4.925	1.43	2.3	2.29	Forest/Woodland	Temperate	Field
WoS4.67	Abundance	1	Plants	88	88	63.45	15.66	69.55	13.57	Forest/Woodland	Temperate	Field
WoS4.67	Abundance	1	Plants	88	88	16.75	2.83	17.2	1.89	Forest/Woodland	Temperate	Field
WoS4.67	Abundance	1	Plants	88	88	36.325	14.35	42.5	13.5	Forest/Woodland	Temperate	Field
WoS4.67	Abundance	-1	Plants	88	88	46.5	15.53	38.35	14.99	Forest/Woodland	Temperate	Field
WoS4.67	Abundance	1	Plants	88	88	17.15	3.1	19.15	2.99	Forest/Woodland	Temperate	Field
WoS4.76	Abundance	1	Invertebrates	3	3	200	28.17	408	44.07	Forest/Woodland	Tropical	Landscape
WoS4.76	Abundance	1	Invertebrates	3	3	200	28.17	57	11.74	Forest/Woodland	Tropical	Landscape
WoS4.84	Diversity	1	Plants	915	915	1	1.5	4.6	9.42	Grasslands/Meadow	Temperate	Field
WoS4.93	Abundance	1	Vertebrates	2	2	4	2.74	2	0.9	Forest/Woodland	Temperate	Landscape
WoS4.93	Abundance	1	Vertebrates	2	2	2	1.5	2	1.82	Forest/Woodland	Temperate	Landscape
WoS4.93	Diversity	1	Vertebrates	2	2	18	2.05	29	4	Forest/Woodland	Temperate	Landscape
WoS5.98	Abundance	1	Plants	62	165	1.89	2.76	0.7	1.06	Forest/Woodland	Temperate	Landscape
WoS5.98	Abundance	1	Plants	62	165	48.5	18.92	26.98	15.43	Grasslands/Meadow	Temperate	Landscape
WoS6.7	Diversity	1	Plants	10	20	16.7	3.79	22.2	3.58	Forest/Woodland	Tropical	Field
WoS6.7	Diversity	1	Vertebrates	10	20	8.1	5.69	15.1	5.81	Forest/Woodland	Tropical	Field
WoS6.45	Abundance	1	Vertebrates	15	15	0.28	0.27	0.06	0.08	Forest/Woodland	Temperate	Field
WoS6.56	Diversity	1	Plants	19	19	10	3	6	2	Forest/Woodland	Temperate	Field
WoS6.56	Diversity	1	Plants	19	19	10	3	3	1	Forest/Woodland	Temperate	Field
WoS6.62	Abundance	1	Invertebrates	10	10	0.17	0.16	0.05	0.08	Grasslands/Meadow	Tropical	Landscape
WoS6.62	Abundance	1	Invertebrates	10	10	0.26	0.59	0.05	0.08	Grasslands/Meadow	Tropical	Landscape
WoS6.62	Abundance	1	Invertebrates	10	10	3.32	5.91	2.29	3.22	Forest/Woodland	Tropical	Landscape
WoS6.62	Abundance	1	Invertebrates	10	10	3.32	5.91	1.61	2.73	Grasslands/Meadow	Tropical	Landscape
WoS6.62	Abundance	1	Invertebrates	10	10	1.92	3.06	2.29	3.22	Forest/Woodland	Tropical	Landscape
WoS6.82	Abundance	1	Invertebrates	24	24	36	30.67	30	30.45	Forest/Woodland	Temperate	Landscape
WoS6.91	Diversity	1	Invertebrates	18	18	3	0	3	0	Forest/Woodland	Tropical	Landscape
WoS6.91	Abundance	1	Invertebrates	18	18	0.495	0.2	0.54	0.02	Forest/Woodland	Tropical	Landscape
WoS6.91	Diversity	1	Plants	18	18	3	0	3	0	Forest/Woodland	Tropical	Landscape
WoS6.91	Abundance	1	Invertebrates	18	18	0.495	0.2	0.68	0.2	Forest/Woodland	Tropical	Landscape
WoS6.91	Diversity	1	Plants	18	18	3	0	3.5	0.5	Forest/Woodland	Tropical	Landscape
WoS6.91	Abundance	1	Invertebrates	18	18	0.495	0.2	0.81	0.15	Forest/Woodland	Tropical	Landscape
WoS6.91	Diversity	1	Plants	18	18	3	0	4	0	Forest/Woodland	Tropical	Landscape
WoS6.91	Abundance	1	Invertebrates	18	18	0.495	0.2	0.88	0.11	Forest/Woodland	Tropical	Landscape
WoS6.91	Diversity	1	Plants	18	18	3	0	3	0	Forest/Woodland	Tropical	Landscape
WoS6.91	Abundance	1	Invertebrates	18	18	0.495	0.2	0.75	0.15	Forest/Woodland	Tropical	Landscape
WoS6.91	Diversity	1	Invertebrates	18	18	1.03	0.48	0.93	0.45	Forest/Woodland	Tropical	Landscape
WoS6.91	Diversity	1	Invertebrates	18	18	0.47	0.2	0.52	0.16	Forest/Woodland	Tropical	Landscape
WoS6.91	Diversity	1	Invertebrates	18	18	3.93	2.22	3.68	2.39	Forest/Woodland	Tropical	Landscape
WoS6.91	Diversity	1	Invertebrates	18	18	1.03	0.48	0.97	0.39	Forest/Woodland	Tropical	Landscape
WoS6.91	Diversity	-1	Invertebrates	18	18	0.47	0.2	0.46	0.19	Forest/Woodland	Tropical	Landscape
WoS6.91	Diversity	1	Invertebrates	18	18	3.93	2.22	3.5	1.77	Forest/Woodland	Tropical	Landscape
WoS6.91	Diversity	1	Invertebrates	18	18	1.03	0.48	1.3	0.52	Forest/Woodland	Tropical	Landscape
WoS6.91	Diversity	-1	Invertebrates	18	18	0.47	0.2	0.38	0.16	Forest/Woodland	Tropical	Landscape
WoS6.91	Diversity	1	Invertebrates	18	18	3.93	2.22	5.63	3.47	Forest/Woodland	Tropical	Landscape
WoS6.91	Diversity	1	Invertebrates	18	18	1.03	0.48	0.9	0.22	Forest/Woodland	Tropical	Landscape
WoS6.91	Diversity	-1	Invertebrates	18	18	0.47	0.2	0.52	0.11	Forest/Woodland	Tropical	Landscape
WoS6.91	Diversity	1	Invertebrates	18	18	3.93	2.22	3.25	0.88	Forest/Woodland	Tropical	Landscape
WoS7.28	Abundance	1	Plants	6	6	235	183.86	156	135.93	Forest/Woodland	Tropical	Landscape
WoS7.28	Abundance	1	Plants	6	6	10	6.44	9	4.09	Forest/Woodland	Tropical	Landscape
WoS7.28	Abundance	1	Plants	6	6	2.27	2.37	1.94	3.06	Forest/Woodland	Tropical	Landscape
WoS7.43	Abundance	1	Plants	4	4	0.79	0.14	0.64	0.12	Forest/Woodland	Temperate	Field
WoS7.65	Abundance	1	Plants	7	7	1.07	0.69	2.15	1.03	Forest/Woodland	Temperate	Landscape
WoS7.65	Abundance	1	Plants	7	7	0.25	0.13	0.3	0.13	Forest/Woodland	Temperate	Landscape
WoS7.65	Abundance	1	Plants	7	7	0.18	0.05	0.25	0.05	Forest/Woodland	Temperate	Landscape
WoS7.65	Abundance	1	Plants	7	7	0.17	0.05	0.15	0.13	Forest/Woodland	Temperate	Landscape
WoS7.65	Abundance	1	Plants	7	7	0.17	0.03	0.18	0.08	Forest/Woodland	Temperate	Landscape
WoS7.65	Abundance	1	Plants	7	7	0.28	0.13	0.13	0.03	Forest/Woodland	Temperate	Landscape
WoS7.65	Abundance	1	Plants	7	7	67	26	197	36	Forest/Woodland	Temperate	Landscape
WoS7.65	Abundance	1	Plants	7	7	44	14	157	35	Forest/Woodland	Temperate	Landscape
WoS7.65	Abundance	1	Plants	7	7	38	13	89	25	Forest/Woodland	Temperate	Landscape
WoS7.65	Abundance	1	Plants	7	7	37	11	106	21	Forest/Woodland	Temperate	Landscape
WoS7.65	Abundance	1	Plants	7	7	48	9	78	9	Forest/Woodland	Temperate	Landscape
WoS7.84	Diversity	1	Vertebrates	4	4	0.7	0.5	1.6	0.5	Forest/Woodland	Temperate	Landscape
WoS7.84	Abundance	1	Vertebrates	4	4	0.25	0.25	0.6	0.2	Forest/Woodland	Temperate	Landscape
WoS7.84	Abundance	1	Vertebrates	4	4	0.1	0.2	0.5	0.25	Forest/Woodland	Temperate	Landscape
WoS7.93	Abundance	1	Invertebrates	10	10	239	63.77	80	22.48	Forest/Woodland	Temperate	Landscape
WoS7.93	Diversity	1	Invertebrates	10	10	0.13	0.25	0.06	0.14	Forest/Woodland	Temperate	Landscape
WoS7.93	Diversity	1	Invertebrates	10	10	0.13	0.25	0.1	0.25	Forest/Woodland	Temperate	Landscape
WoS7.94	Abundance	1	Plants	18	18	91.74	12.9	91.74	12.9	Forest/Woodland	Temperate	Field
WoS7.94	Abundance	1	Plants	18	18	3.67	8.95	3.67	8.95	Forest/Woodland	Temperate	Field
WoS7.94	Abundance	1	Plants	18	18	87.41	20.83	87.41	20.83	Forest/Woodland	Temperate	Field
WoS8.19	Diversity	1	Plants	3	3	20	8.19	26	9.54	Forest/Woodland	Temperate	Landscape
WoS8.19	Diversity	1	Plants	3	3	12.33	9.72	22	9.54	Forest/Woodland	Temperate	Landscape
WoS8.19	Diversity	1	Plants	3	3	7	3.6	3	0	Forest/Woodland	Temperate	Landscape
WoS8.19	Diversity	1	Plants	3	3	0.67	0.57	1	0	Forest/Woodland	Temperate	Landscape
WoS8.19	Diversity	1	Plants	3	3	2.55	0.55	1.24	0.57	Forest/Woodland	Temperate	Landscape
WoS8.19	Diversity	1	Plants	3	3	1.86	1.58	3.03	0.68	Forest/Woodland	Temperate	Landscape
WoS8.19	Diversity	1	Plants	3	3	1.98	0.64	0.68	0.23	Forest/Woodland	Temperate	Landscape
WoS8.19	Abundance	1	Vertebrates	3	3	15	8.66	17	8.66	Forest/Woodland	Temperate	Landscape
WoS8.19	Diversity	1	Vertebrates	3	3	2	0.87	2.75	0.43	Forest/Woodland	Temperate	Landscape
WoS8.23	Diversity	1	Plants	19	19	89	4.84	93	3.88	Forest/Woodland	Tropical	Landscape
WoS8.23	Diversity	1	Plants	19	19	3.181	0.35	3.436	0.36	Forest/Woodland	Tropical	Landscape
WoS8.23	Diversity	1	Plants	19	19	0.709	0.08	0.758	0.1	Forest/Woodland	Tropical	Landscape
WoS8.27	Abundance	1	Vertebrates	4	4	20.85	1.85	44.75	8.35	Forest/Woodland	Temperate	Landscape
WoS8.27	Abundance	1	Vertebrates	4	4	2.7	0.4	2.95	0.05	Forest/Woodland	Temperate	Landscape
WoS8.27	Abundance	1	Vertebrates	4	4	0.345	0.1	0.32	0.13	Forest/Woodland	Temperate	Landscape
WoS8.69	Abundance	1	Vertebrates	3	3	263	143.5	466	159.5	Forest/Woodland	Tropical	Landscape
WoS10.8	Abundance	1	Vertebrates	24	24	3.91	4.48	4.12	7.83	Forest/Woodland	Temperate	Landscape
WoS10.25	Abundance	1	Invertebrates	8	8	1433	329.98	867	817.86	Grasslands/Meadow	Temperate	Field
WoS10.157	Diversity	1	Plants	1268	1268	11	6	9	6	Forest/Woodland	Temperate	Landscape
