# Supplementary material for: Contributions of Hedgerows to People: A Global Meta-Analysis
Source: Frontiers journal article supplement (doi:10.3389/fcosc.2021.789612), 2021-12-22
Supplement: Table_8.DOCX [file Table_8.DOCX]

##Unfortunately text files (.txt) are not supporting as a Data sheet by Frontiers submission system##########

######First of all, please transform Data_file_S2.xlsx into Data_file_S2.txt separated by tabulator##########

rm(list=ls(all=TRUE))

#install.packages("metafor",dep=TRUE)

library(metafor)

SeHENH<-read.table("C:/Frontiers/Data_file_S5.txt",header=TRUE,dec=",")

SeHENH2 <- escalc("SMD",m1i=Hedgerow.Value,sd1i=Hedgerow.SD+0.1,n1i=nHedgerow,

m2i=Natural.habitat.Value,sd2i=Natural.habitat.SD+0.1,n2i=nControl,data=SeHENH)

SeHENH2$yi<-SeHENH2$yi*SeHENH2$New.sign

#Vote counting

nrow(SeHENH2[SeHENH2$yi<0,]) # Natural habitat better than Hedgerow

nrow(SeHENH2[SeHENH2$yi>0,]) # Hedgerow better than natural habitat

nrow(SeHENH[SeHENH2$yi==0,]) # Hedgerow similar as natural habitat

##Null model

rem <- rma.mv(yi, vi, random = ~ 1 | Identifier, data=SeHENH2)

rem # The difference is significant(p = 0.02) and negative(-0.4933 +- 0.2047). Natural habitats are better!

sav <- confint(rem)

W <- diag(1/SeHENH2$vi)

X <- model.matrix(rem)

P <- W - W %*% X %*% solve(t(X) %*% W %*% X) %*% t(X) %*% W

100 * sum(rem$sigma2) / (sum(rem$sigma2) + (rem$k-rem$p)/sum(diag(P))) # % heterogeneidad

100 * sav$random[1,2:3] / (sav$random[1,2:3] + (rem$k-rem$p)/sum(diag(P))) # Intervalo de confianza del %

##Total I^2 is high 58.20 - 94.84 % #### This justifies the inclusion of moderators

#Next lines select for relevant variables

datm <- SeHENH2[,c(1,4,16,17,18,19,20)]

#and delete rows with any NAs

datm <- datm[complete.cases(datm),]

rma.mv.Overall<-rma.mv(yi,vi,mods=~Ecosystem.Service+Natural.habitat.type+Climate.type+Spatial.Scale.Focus,

random=~1|Identifier,data=datm)

summary(rma.mv.Overall)

rma.mv.Ecosystem.Service<-rma.mv(yi,vi,mods=~0+Ecosystem.Service,random=~1|Identifier,data=SeHENH2)

summary(rma.mv.Ecosystem.Service)

anova(rma.mv.Ecosystem.Service, L=c(1,-1))#(QM = 0.21, p = 0.64; non-significant).

rma.mv.Climate.type<-rma.mv(yi,vi,mods=~0+Climate.type,random=~1|Identifier,data=SeHENH2)

summary(rma.mv.Climate.type)

anova(rma.mv.Climate.type, L=c(1,-1)) #(QM = 0.36, p = 0.55 ; non-significant)

rma.mv.Focus.of.spatial.scale<-rma.mv(yi,vi,mods=~0+Spatial.Scale.Focus,random=~1|Identifier,data=SeHENH2)

summary(rma.mv.Focus.of.spatial.scale)

anova(rma.mv.Focus.of.spatial.scale, L=c(1,-1)) #(QM = 1.39, p = 0.24; non-significant)

datg1 <- as.data.frame(matrix(,nrow=7,ncol=6)) # Creo una base de datos vacia

datg1[7,1] <- "aLandscape"

datg1[7,2] <- length(SeHENH2$Spatial.Scale.Focus[SeHENH2$Spatial.Scale.Focus=="Landscape"])

datg1[7,3] <- as.numeric(rma.mv.Focus.of.spatial.scale$beta[2])

datg1[7,4] <- as.numeric(rma.mv.Focus.of.spatial.scale$se[2])

datg1[7,5] <- as.numeric(rma.mv.Focus.of.spatial.scale$ci.lb[2])

datg1[7,6] <- as.numeric(rma.mv.Focus.of.spatial.scale$ci.ub[2])

datg1[6,1] <- "bField"

datg1[6,2] <- length(SeHENH2$Spatial.Scale.Focus[SeHENH2$Spatial.Scale.Focus=="Field"])

datg1[6,3] <- as.numeric(rma.mv.Focus.of.spatial.scale$beta[1])

datg1[6,4] <- as.numeric(rma.mv.Focus.of.spatial.scale$se[1])

datg1[6,5] <- as.numeric(rma.mv.Focus.of.spatial.scale$ci.lb[1])

datg1[6,6] <- as.numeric(rma.mv.Focus.of.spatial.scale$ci.ub[1])

datg1[5,1] <- "cTemperate"

datg1[5,2] <- length(SeHENH$Climate.type[SeHENH$Climate.type=="Temperate"])

datg1[5,3] <- as.numeric(rma.mv.Climate.type$beta[2])

datg1[5,4] <- as.numeric(rma.mv.Climate.type$se[2])

datg1[5,5] <- as.numeric(rma.mv.Climate.type$ci.lb[2])

datg1[5,6] <- as.numeric(rma.mv.Climate.type$ci.ub[2])

datg1[4,1] <- "dTropical"

datg1[4,2] <- length(SeHENH2$Climate.type[SeHENH2$Climate.type=="Tropical"])

datg1[4,3] <- as.numeric(rma.mv.Climate.type$beta[1])

datg1[4,4] <- as.numeric(rma.mv.Climate.type$se[1])

datg1[4,5] <- as.numeric(rma.mv.Climate.type$ci.lb[1])

datg1[4,6] <- as.numeric(rma.mv.Climate.type$ci.ub[1])

datg1[3,1] <- "gRegulation"

datg1[3,2] <- length(SeHENH2$Ecosystem.Service[SeHENH2$Ecosystem.Service=="Regulation"])

datg1[3,3] <- as.numeric(rma.mv.Ecosystem.Service$beta[2])

datg1[3,4] <- as.numeric(rma.mv.Ecosystem.Service$se[2])

datg1[3,5] <- as.numeric(rma.mv.Ecosystem.Service$ci.lb[2])

datg1[3,6] <- as.numeric(rma.mv.Ecosystem.Service$ci.ub[2])

datg1[2,1] <- "hSupport"

datg1[2,2] <- length(SeHENH2$Ecosystem.Service[SeHENH2$Ecosystem.Service=="Support"])

datg1[2,3] <- as.numeric(rma.mv.Ecosystem.Service$beta[1])

datg1[2,4] <- as.numeric(rma.mv.Ecosystem.Service$se[1])

datg1[2,5] <- as.numeric(rma.mv.Ecosystem.Service$ci.lb[1])

datg1[2,6] <- as.numeric(rma.mv.Ecosystem.Service$ci.ub[1])

datg1[1,1] <- "jMain effect"

datg1[1,2] <- length(SeHENH2$yi)

datg1[1,3] <- as.numeric(rem$beta[1])

datg1[1,4] <- as.numeric(rem$se[1])

datg1[1,5] <- as.numeric(rem$ci.lb[1])

datg1[1,6] <- as.numeric(rem$ci.ub[1])

colnames(datg1) <- c("var","n","estimate","se","cil","ciu")

datg1$var <- as.factor(datg1$var)

library(ggplot2)

library(ggstance)

plot <- ggplot(data=datg1, aes(y=var, x=estimate, xmin=datg1$cil,xmax=datg1$ciu))

mains <- plot + geom_point(size = 2.5,fatten=2,position=position_dodgev(height=0.60))+

geom_errorbarh(aes(xmin=datg1$cil,

xmax=datg1$ciu),

size=1.1,position=position_dodgev(height=0.60)) +

geom_vline(aes(xintercept=0),linetype="dashed",colour="red")+

geom_hline(aes(yintercept=2.5),colour="grey80")+

geom_hline(aes(yintercept=4.5),colour="grey80")+

geom_hline(aes(yintercept=6.5),colour="grey80")+

geom_hline(aes(yintercept=9.5),colour="grey80")+

xlab(label = "Effect size") + #Cambiar con cada predictor

ylab(label = "") +

scale_y_discrete(labels=c("jMain effect"="Main effect","iProvision"="Provision","gRegulation"="Regulating",

"hSupport"="Supporting","fForest"="Forest/Woodland","eGrasslands/Meadow"="Grasslands/Meadow",

"dTropical"="Tropical","cTemperate"="Temperate",

"bField"="Field","aLandscape"="Landscape"))+

scale_x_continuous(limits=c(-2.5,2.5),breaks=c(-2,-1,0,1,2))+

geom_text(x=-2.4,y=7,label = datg1[1,2],size=4)+

geom_text(x=-2.4,y=6,label = datg1[2,2],size=4)+

geom_text(x=-2.4,y=5,label = datg1[3,2],size=4)+

geom_text(x=-2.4,y=4,label = datg1[4,2],size=4)+

geom_text(x=-2.4,y=3,label = datg1[5,2],size=4)+

geom_text(x=-2.4,y=2,label = datg1[6,2],size=4)+

geom_text(x=-2.4,y=1,label = datg1[7,2],size=4)+

theme_bw()+

theme(legend.position="none")+

theme(panel.grid.major.y = element_blank(), panel.grid.minor.y = element_blank(),

panel.grid.major.x = element_blank(), panel.grid.minor.x = element_blank())+

theme(axis.text=element_text(size=14),axis.title=element_text(size=16,face="bold"))

mains

ggsave(filename="C:/Frontiers/Figure5.jpg",dpi = 1200, plot=mains, width = 120, height = 150, units = "mm")
