# Supplementary material for: Contributions of Hedgerows to People: A Global Meta-Analysis
Source: Frontiers journal article supplement (doi:10.3389/fcosc.2021.789612), 2021-12-22
Supplement: Table_9.XLSX [file Table_9.XLSX]

## Sheet: Hoja1
Country	lat	long
Argentina	-36.3	-60
Australia	-35.15	149.08
Belgium	50.51	4.21
Benin	6.23	2.42
Brazil	-15.47	-47.55
BurkinaFaso	12.15	-1.3
Cameroon	3.5	11.35
Canada	45.27	-75.42
China	39.55	116.2
Colombia	4.34	-74
Costa.Rica	9.55	-84.02
Czechia	50.05	14.22
Denmark	55.41	12.34
Estonia	59.22	24.48
Ethiopia	9.02	38.42
France	48.5	2.2
Germany	52.3	13.25
Greece	37.58	23.46
India	28.37	77.13
Ireland	53.21	-6.15
Italy	41.54	12.29
Japan	35.67	139.65
Kenya	-1.17	36.48
Mexico	19.2	-99.1
Nepal	27.45	85.2
Netherlands	52.23	4.54
New.Zealand	-41.19	174.46
Panama	9	-79.25
Peru	-12	-77
Philippines	14.4	121.03
Poland	52.13	21
Portugal	38.42	-9.1
Slovakia	48.1	17.07
Spain	40.25	-3.45
Switzerland	46.57	7.28
Thailand	13.45	100.35
Togo	6.09	1.2
UK	51.5	-0.13
USA	39.91	-77.02
