# Supplementary material for: Contributions of Hedgerows to People: A Global Meta-Analysis
Source: Frontiers journal article supplement (doi:10.3389/fcosc.2021.789612), 2021-12-22
Supplement: Table_11.XLSX [file Table_11.XLSX]

## Sheet: Hoja1
Identifier	New.sign	New.Response	Ecosystem.Service	nHedgerow	nControl	Hedgerow.Value	Hedgerow.SD	Farmland.Value	Farmland.SD	Farmland.type	Crop.type	Climate.type	Spatial.Scale.Focus
WoS1.5	-1	SoilF	Support	48	36	0.95	0.07	0.96	0.1	Crop	Herbaceous	Tropical	Field
WoS1.5	1	Water	Regulation	48	36	0.26	0.03	0.27	0.04	Crop	Herbaceous	Tropical	Field
WoS1.8	1	Food	Provisioning	8	8	1.23	0.02	1.14	0.02	Crop	Herbaceous	Tropical	Field
WoS1.8	1	Food	Provisioning	8	8	0.73	0.04	0.57	0.04	Crop	Herbaceous	Tropical	Field
WoS1.80	1	SoilR	Regulation	10	10	1.27	0.1	0.86	0.17	Crop	Herbaceous	Temperate	Field
WoS1.80	1	SoilR	Regulation	10	10	1.18	0.11	0.82	0.03	Crop	Herbaceous	Temperate	Field
WoS1.80	1	SoilR	Regulation	10	10	2.08	0.34	1.54	0.05	Crop	Herbaceous	Temperate	Field
WoS1.90	1	SoilR	Regulation	10	10	6.9	0.32	7.3	0.63	Crop	Herbaceous	Temperate	Field
WoS1.90	1	Nitrogen	Support	10	10	30.6	8.54	16.5	5.06	Crop	Herbaceous	Temperate	Field
WoS1.90	1	Phosphorus	Support	10	10	16.5	3.48	14.6	5.69	Crop	Herbaceous	Temperate	Field
WoS1.90	1	SoilR	Regulation	10	10	16.3	2.21	8.1	0.63	Crop	Herbaceous	Temperate	Field
WoS1.90	1	SoilR	Regulation	10	10	0.3	0.03	0.2	0.03	Crop	Herbaceous	Temperate	Field
WoS1.90	-1	Pests	Regulation	10	10	5	9.49	15	9.49	Crop	Herbaceous	Temperate	Field
WoS1.90	-1	Pests	Regulation	8	8	10	14.14	10	8.49	Crop	Herbaceous	Temperate	Field
WoS1.90	-1	Pests	Regulation	10	10	750	1581.14	500	790.57	Crop	Herbaceous	Temperate	Field
WoS2.53	-1	Pests	Regulation	8	8	0.93	0.08	0.91	0.08	Crop	Herbaceous	Temperate	Field
WoS2.53	-1	Pests	Regulation	8	8	0.93	0.06	0.91	0.08	Crop	Herbaceous	Temperate	Field
WoS3.51	-1	Nitrogen	Support	15	15	19	9.6	24	14	Crop	Herbaceous	Temperate	Landscape
WoS3.51	-1	Phosphorus	Support	15	15	5	2.09	5	3	Crop	Herbaceous	Temperate	Landscape
WoS3.51	-1	SoilF	Support	15	15	776	906.53	5053	5198	Crop	Herbaceous	Temperate	Landscape
WoS3.51	-1	Nitrogen	Support	15	15	1	0.81	3	2	Crop	Herbaceous	Temperate	Landscape
WoS3.51	-1	Phosphorus	Support	15	15	4	2.82	13	9	Crop	Herbaceous	Temperate	Landscape
WoS3.84	-1	Pests	Regulation	9	9	34	13.8	25	12.9	Crop	Herbaceous	Tropical	Field
WoS3.84	-1	Pests	Regulation	9	9	20.7	14.1	31.6	13.5	Crop	Herbaceous	Tropical	Field
WoS3.84	-1	Pests	Regulation	9	9	16.7	11.7	29.5	12.6	Crop	Herbaceous	Tropical	Field
WoS3.84	-1	Pests	Regulation	9	9	173	154.58	298	384	Crop	Herbaceous	Tropical	Field
WoS4.17	1	Food	Provisioning	3	3	1.88	0.11	2.02	0.54	Crop	Herbaceous	Tropical	Field
WoS4.17	1	Food	Provisioning	3	3	1.32	0.91	2.02	0.54	Crop	Herbaceous	Tropical	Field
WoS4.17	1	Food	Provisioning	3	3	1.98	0.44	2.02	0.54	Crop	Herbaceous	Tropical	Field
WoS4.17	1	Food	Provisioning	3	3	1.37	0.17	1.26	0.19	Crop	Herbaceous	Tropical	Field
WoS4.17	1	Food	Provisioning	3	3	1.23	0.06	1.26	0.19	Crop	Herbaceous	Tropical	Field
WoS4.17	1	Food	Provisioning	3	3	1.44	0.27	1.26	0.19	Crop	Herbaceous	Tropical	Field
WoS4.17	1	Food	Provisioning	3	3	1.74	0.31	1.25	0.85	Crop	Herbaceous	Tropical	Field
WoS4.17	1	Food	Provisioning	3	3	1.44	0.06	1.25	0.85	Crop	Herbaceous	Tropical	Field
WoS4.17	1	Food	Provisioning	3	3	1.67	0.39	1.25	0.85	Crop	Herbaceous	Tropical	Field
WoS4.17	1	Food	Provisioning	3	3	3.25	0.23	2.98	1.29	Crop	Herbaceous	Tropical	Field
WoS4.17	1	Food	Provisioning	3	3	2.99	0.78	2.98	1.29	Crop	Herbaceous	Tropical	Field
WoS4.17	1	Food	Provisioning	3	3	3.21	1.13	2.98	1.29	Crop	Herbaceous	Tropical	Field
WoS4.17	1	Food	Provisioning	3	3	15.96	1.14	16.05	1	Crop	Woody	Tropical	Field
WoS4.17	1	Food	Provisioning	3	3	15.53	0.89	16.05	1	Crop	Woody	Tropical	Field
WoS4.17	1	Food	Provisioning	3	3	18.23	1.26	16.05	1	Crop	Woody	Tropical	Field
WoS4.17	-1	Nitrogen	Support	3	3	205.3	24.94	226.9	14.42	Crop	Woody	Tropical	Field
WoS4.17	-1	Nitrogen	Support	3	3	193	21.09	226.9	14.42	Crop	Woody	Tropical	Field
WoS4.17	-1	Nitrogen	Support	3	3	208.9	10.62	226.9	14.42	Crop	Woody	Tropical	Field
WoS4.22	1	Climate	Regulation	146	146	1.4	2.42	0.6	1.21	Crop	Herbaceous	Tropical	Field
WoS4.22	1	Climate	Regulation	146	146	3.4	4.83	0.6	1.21	Crop	Herbaceous	Tropical	Field
WoS4.70	-1	Pests	Regulation	3	3	1	0.09	0	0	Crop	Woody	Temperate	Field
WoS4.87	1	Food	Provisioning	20	20	1157	177.99	1180	307	Crop	Herbaceous	Tropical	Field
WoS5.31	1	Water	Regulation	5	5	35.9	5.62	23	4.31	Crop	Herbaceous	Temperate	Field
WoS5.31	1	Climate	Regulation	5	5	5.33	0.9	1.93	0.7	Crop	Herbaceous	Temperate	Field
WoS5.31	1	Nitrogen	Support	5	5	0.44	0.04	0.24	0.03	Crop	Herbaceous	Temperate	Field
WoS5.31	-1	Nitrogen	Support	5	5	12.34	0.8	7.76	0.8	Crop	Herbaceous	Temperate	Field
WoS5.37	1	Pests	Regulation	20	20	57	3.67	35	3.18	Crop	Herbaceous	Temperate	Field
WoS5.38	-1	Pests	Regulation	2	2	17.82	16.3	18	18.16	Crop	Herbaceous	Tropical	Field
WoS5.38	-1	Pests	Regulation	2	2	7.32	6.72	5.61	6.78	Crop	Herbaceous	Tropical	Field
WoS5.38	1	Food	Provisioning	2	2	2.33	1.71	1.73	1.1	Crop	Herbaceous	Tropical	Field
WoS5.64	1	Pests	Regulation	60	60	10	1.94	8.25	1.94	Crop	Herbaceous	Temperate	Landscape
WoS5.89	1	Nitrogen	Support	5	5	23.27	2.55	22.97	1.23	Crop	Herbaceous	Temperate	Field
WoS5.89	1	Nitrogen	Support	5	5	24.65	5.63	27.6	1.83	Crop	Herbaceous	Temperate	Field
WoS5.89	1	Climate	Regulation	5	5	28	1.21	15.21	3.78	Crop	Herbaceous	Temperate	Field
WoS5.89	1	Nitrogen	Support	5	5	517	136.4	466	100.62	Crop	Herbaceous	Temperate	Field
WoS5.89	1	Phosphorus	Support	5	5	27.58	7.71	43.7	9.46	Crop	Herbaceous	Temperate	Field
WoS5.89	-1	Climate	Regulation	5	5	3.02	0.51	3.45	0.72	Crop	Herbaceous	Temperate	Field
WoS5.89	1	Climate	Regulation	5	5	319	49.64	270	53.89	Crop	Herbaceous	Temperate	Field
WoS5.89	1	Nitrogen	Support	5	5	19	3.02	23	3.09	Crop	Herbaceous	Temperate	Field
WoS5.89	1	Phosphorus	Support	5	5	2	0.54	1.33	0.98	Crop	Herbaceous	Temperate	Field
WoS5.89	-1	Nitrogen	Support	5	5	0.34	0.07	0.33	0.74	Crop	Herbaceous	Temperate	Field
WoS5.89	-1	Climate	Regulation	5	5	217	82.73	187	62.61	Crop	Herbaceous	Temperate	Field
WoS6.6	1	Nitrogen	Support	100	100	2.5	0.5	10.5	2.5	Crop	Herbaceous	Tropical	Field
WoS6.6	1	Nitrogen	Support	100	100	55	20.96	57	36	Crop	Herbaceous	Tropical	Field
WoS6.8	1	Food	Provisioning	42	42	8	6.74	9	7	Crop	Herbaceous	Tropical	Field
WoS6.46bis	1	Food	Provisioning	4	4	2	2.61	2	1	Crop	Woody	Tropical	Field
WoS6.91	1	SoilF	Support	18	18	0.95	0.05	1.85	0.75	Crop	Woody	Tropical	Landscape
WoS6.91	1	SoilF	Support	18	18	0.355	0.15	0.95	0.05	Crop	Woody	Tropical	Landscape
WoS6.91	1	SoilF	Support	18	18	0.95	0.05	0.75	0.75	Crop	Woody	Tropical	Landscape
WoS6.91	1	SoilF	Support	18	18	0.355	0.15	0.5	0.5	Crop	Woody	Tropical	Landscape
WoS7.11	-1	SoilF	Support	2	2	1.37	0.07	1.39	0.04	Crop	Woody	Tropical	Field
WoS7.11	1	Climate	Regulation	2	2	1.75	0.23	1.22	0.08	Crop	Woody	Tropical	Field
WoS7.11	1	Nitrogen	Support	2	2	0.1	0.01	0.14	0.01	Crop	Woody	Tropical	Field
WoS7.11	-1	Nitrogen	Support	2	2	12.18	0.99	12.58	0.68	Crop	Woody	Tropical	Field
WoS7.20	-1	Water	Regulation	2	2	4.5	4.5	25	19	Crop	Herbaceous	Tropical	Field
WoS7.20	-1	SoilF	Support	2	2	0.06	0.04	0.34	0.12	Crop	Herbaceous	Tropical	Field
WoS7.20	-1	Water	Regulation	2	2	1	0.5	11	10	Crop	Herbaceous	Tropical	Field
WoS7.48	1	Nitrogen	Support	45	45	0.45	0.15	0.25	0.05	Crop	Herbaceous	Temperate	Field
WoS7.48	1	Nitrogen	Support	45	45	0.45	0.15	0.25	0.05	Crop	Herbaceous	Temperate	Field
WoS7.48	1	Nitrogen	Support	45	45	0.45	0.15	0.2	0.2	Crop	Herbaceous	Temperate	Field
WoS7.48	1	Nitrogen	Support	45	45	2.35	0.85	2.45	0.15	Crop	Herbaceous	Temperate	Field
WoS7.48	1	Nitrogen	Support	45	45	2.35	0.85	2.4	0.2	Crop	Herbaceous	Temperate	Field
WoS7.48	1	Nitrogen	Support	45	45	2.35	0.85	1.5	0	Crop	Herbaceous	Temperate	Field
WoS7.48	1	Nitrogen	Support	45	45	0.1	0	0	0	Crop	Herbaceous	Temperate	Field
WoS7.48	1	Nitrogen	Support	45	45	0.1	0	0.05	0.05	Crop	Herbaceous	Temperate	Field
WoS7.48	1	Nitrogen	Support	45	45	0.1	0	0	0	Crop	Herbaceous	Temperate	Field
WoS7.48	1	Nitrogen	Support	45	45	0.45	0.15	0.5	0	Crop	Herbaceous	Temperate	Field
WoS7.48	1	Nitrogen	Support	45	45	0.45	0.15	0.45	0.05	Crop	Herbaceous	Temperate	Field
WoS7.48	1	Nitrogen	Support	45	45	0.45	0.15	0.3	0	Crop	Herbaceous	Temperate	Field
WoS7.48	1	Nitrogen	Support	45	45	9.75	4.85	9.2	1.4	Crop	Herbaceous	Temperate	Field
WoS7.48	1	Nitrogen	Support	45	45	9.75	4.85	16.9	7.6	Crop	Herbaceous	Temperate	Field
WoS7.48	1	Nitrogen	Support	45	45	9.75	4.85	6.35	1.45	Crop	Herbaceous	Temperate	Field
WoS7.48	1	SoilR	Regulation	45	45	7	0.1	7	0	Crop	Herbaceous	Temperate	Field
WoS7.48	1	Nitrogen	Support	45	45	23.2	1.7	20.65	0.95	Crop	Herbaceous	Temperate	Field
WoS7.48	1	Nitrogen	Support	45	45	23.2	1.7	22.9	0	Crop	Herbaceous	Temperate	Field
WoS7.48	1	Nitrogen	Support	45	45	23.2	1.7	22.55	0.15	Crop	Herbaceous	Temperate	Field
WoS7.48	1	Climate	Regulation	45	45	208	41.8	168.55	7.95	Crop	Herbaceous	Temperate	Field
WoS7.48	1	Climate	Regulation	45	45	208	41.8	212.65	15.65	Crop	Herbaceous	Temperate	Field
WoS7.48	1	Climate	Regulation	45	45	208	41.8	192.6	2.8	Crop	Herbaceous	Temperate	Field
WoS7.48	1	Nitrogen	Support	45	45	0.1	0	0.1	0	Crop	Herbaceous	Temperate	Field
WoS7.48	1	Nitrogen	Support	45	45	0.1	0	0.1	0	Crop	Herbaceous	Temperate	Field
WoS7.48	1	Nitrogen	Support	45	45	0.1	0	0.1	0	Crop	Herbaceous	Temperate	Field
WoS7.48	1	Climate	Regulation	45	45	1.05	0.25	0.85	0.05	Crop	Herbaceous	Temperate	Field
WoS7.48	1	Climate	Regulation	45	45	1.05	0.25	1.1	0.1	Crop	Herbaceous	Temperate	Field
WoS7.48	1	Climate	Regulation	45	45	1.05	0.25	1	0.1	Crop	Herbaceous	Temperate	Field
WoS7.48	1	Phosphorus	Support	45	45	22.05	6.05	28.4	28.4	Crop	Herbaceous	Temperate	Field
WoS7.48	1	Phosphorus	Support	45	45	22.05	6.05	36.3	1.2	Crop	Herbaceous	Temperate	Field
WoS7.48	1	Phosphorus	Support	45	45	22.05	6.05	30.8	3	Crop	Herbaceous	Temperate	Field
WoS7.48	1	Water	Regulation	45	45	0.2	0	0.215	0.015	Crop	Herbaceous	Temperate	Field
WoS7.48	1	Water	Regulation	45	45	0.2	0	0.2	0	Crop	Herbaceous	Temperate	Field
WoS7.48	1	Water	Regulation	45	45	0.2	0	0.2	0	Crop	Herbaceous	Temperate	Field
WoS7.48	-1	SoilF	Support	45	45	1.4	0.1	1.3	0	Crop	Herbaceous	Temperate	Field
WoS7.48	-1	SoilF	Support	45	45	1.4	0.1	1.3	0	Crop	Herbaceous	Temperate	Field
WoS7.48	-1	SoilF	Support	45	45	1.4	0.1	1.25	0.05	Crop	Herbaceous	Temperate	Field
WoS7.48	1	Climate	Regulation	45	45	161.8	80.7	146.65	52.45	Crop	Herbaceous	Temperate	Field
WoS7.48	1	Climate	Regulation	45	45	161.8	80.7	172.15	35.75	Crop	Herbaceous	Temperate	Field
WoS7.48	1	Climate	Regulation	45	45	161.8	80.7	174.05	64.15	Crop	Herbaceous	Temperate	Field
WoS7.73	1	Food	Provisioning	9	9	42.65	1.55	79.17	2.4	Crop	Herbaceous	Tropical	Field
WoS7.74	1	Food	Provisioning	3	3	14	3.37	17	3	Crop	Herbaceous	Tropical	Field
WoS7.74	1	SoilR	Regulation	3	3	2	0.15	2	0	Crop	Herbaceous	Tropical	Field
WoS7.80	1	Food	Provisioning	57	57	15	2.24	0	0	Crop	Herbaceous	Tropical	Field
WoS7.94	-1	SoilF	Support	18	18	4.59	10.35	83.11	15.53	Crop	Herbaceous	Temperate	Field
WoS7.94	1	SoilF	Support	18	18	43.15	47.52	0.78	1.44	Crop	Herbaceous	Temperate	Field
WoS7.94	-1	SoilF	Support	18	18	1.09	0.08	1.13	0.08	Crop	Herbaceous	Temperate	Field
WoS7.94	1	Water	Regulation	18	18	20.27	3.61	16.7	1.53	Crop	Herbaceous	Temperate	Field
WoS7.94	1	Nitrogen	Support	18	18	0.19	0.04	0.12	0.04	Crop	Herbaceous	Temperate	Field
WoS7.94	1	Climate	Regulation	18	18	3.14	0.76	2.33	0.21	Crop	Herbaceous	Temperate	Field
WoS7.94	1	Climate	Regulation	18	18	2.65	0.55	1.85	0.34	Crop	Herbaceous	Temperate	Field
WoS7.94	-1	SoilF	Support	18	18	4.59	10.35	41.67	10.14	Crop	Herbaceous	Temperate	Field
WoS7.94	1	SoilF	Support	18	18	43.15	47.52	1.81	3.31	Crop	Herbaceous	Temperate	Field
WoS7.94	-1	SoilF	Support	18	18	1.09	0.08	1.38	0.08	Crop	Herbaceous	Temperate	Field
WoS7.94	1	Water	Regulation	18	18	20.27	3.61	18.58	3.9	Crop	Herbaceous	Temperate	Field
WoS7.94	1	Nitrogen	Support	18	18	0.19	0.04	0.15	0.04	Crop	Herbaceous	Temperate	Field
WoS7.94	1	Climate	Regulation	18	18	3.14	0.76	2.45	0.25	Crop	Herbaceous	Temperate	Field
WoS7.94	1	Climate	Regulation	18	18	2.65	0.55	2.34	1.32	Crop	Herbaceous	Temperate	Field
WoS7.94	1	Climate	Regulation	18	18	2	0.42	1.83	0.42	Pasture	NA	Temperate	Field
WoS7.95	1	Nitrogen	Support	42	42	2.5	0.2	2.05	0.895824	Crop	Herbaceous	Temperate	Landscape
WoS7.95	1	Climate	Regulation	42	42	22.45	3.65	21.25	0.923309	Crop	Herbaceous	Temperate	Landscape
WoS7.95	1	Phosphorus	Support	42	42	31	2.7	21.25	0.923309	Crop	Herbaceous	Temperate	Landscape
WoS7.95	-1	SoilF	Support	42	42	1.335	0.06	1.1	0.4	Crop	Herbaceous	Temperate	Landscape
WoS7.95	1	Nitrogen	Support	42	42	2.175	1.2	1.7	1.3	Crop	Herbaceous	Temperate	Landscape
WoS7.95	1	Nitrogen	Support	42	42	5.6	1.9	3.3	1	Crop	Herbaceous	Temperate	Landscape
WoS7.95	1	Nitrogen	Support	42	42	17.5	10.21	10.8	6.4	Crop	Herbaceous	Temperate	Landscape
WoS7.95	1	Climate	Regulation	42	42	207	66.9	213.1	21.9	Crop	Herbaceous	Temperate	Landscape
WoS8.24	-1	Water	Regulation	8	8	-32.5	10.5	-75.5	3.5	Crop	Herbaceous	Tropical	Landscape
WoS8.24	-1	SoilF	Support	8	8	-96	2	-90.5	2.5	Crop	Herbaceous	Tropical	Landscape
WoS8.25	1	Food	Provisioning	50	50	3.12	0.61	1.21	0.24	Crop	Woody	Tropical	Field
WoS8.25	1	Food	Provisioning	50	50	0.9	0.18	0.31	0.05	Crop	Woody	Tropical	Field
WoS8.25	1	Food	Provisioning	50	50	8.89	2.16	6.68	1.45	Crop	Woody	Tropical	Field
WoS8.25	1	Food	Provisioning	50	50	2.57	0.62	1.75	0.27	Crop	Woody	Tropical	Field
WoS8.25	1	Food	Provisioning	50	50	525	34.43	745	68.48	Crop	Woody	Tropical	Field
WoS8.25	1	Water	Regulation	50	50	71	0.44	73.3	2.38	Crop	Woody	Tropical	Field
WoS8.37	1	Climate	Regulation	8	8	170	42.43	120	28.28	Crop	Herbaceous	Temperate	Field
WoS8.37	1	Climate	Regulation	8	8	130	14.14	135	14.14	Crop	Herbaceous	Temperate	Field
WoS8.37	-1	SoilF	Support	8	8	1097.7	26.7	1278.1	35.5	Crop	Herbaceous	Temperate	Field
WoS8.37	-1	SoilF	Support	8	8	1212.15	15.65	1280.45	32.85	Crop	Herbaceous	Temperate	Field
WoS8.37	1	Climate	Regulation	8	8	53.25	6.55	40.4	8.2	Crop	Herbaceous	Temperate	Field
WoS8.37	1	Climate	Regulation	8	8	38.35	9.05	36.45	10.15	Crop	Herbaceous	Temperate	Field
WoS8.37	1	SoilR	Regulation	8	8	2.5	1.41	1	1.41	Crop	Herbaceous	Temperate	Field
WoS8.37	1	SoilR	Regulation	8	8	3	1.41	1.25	0.71	Crop	Herbaceous	Temperate	Field
WoS8.37	1	Climate	Regulation	8	8	250	212.13	125	42.43	Crop	Herbaceous	Temperate	Field
WoS8.37	1	Climate	Regulation	8	8	250	169.71	130	28.28	Crop	Herbaceous	Temperate	Field
WoS8.48	1	Food	Provisioning	3	3	2917	849.84	2000	935	Crop	Herbaceous	Tropical	Landscape
WoS8.82	-1	Pests	Regulation	4	4	51	15.66	34	23	Pasture	NA	Temperate	Landscape
WoS8.91	1	Food	Provisioning	2	2	881.5	19.5	1226.25	657.018	Crop	Herbaceous	Tropical	Landscape
WoS8.91	1	Food	Provisioning	2	2	293.5	19.5	657.25	500.434	Crop	Herbaceous	Tropical	Landscape
WoS8.91	1	Food	Provisioning	2	2	89	8	313	170	Crop	Herbaceous	Tropical	Landscape
WoS10.15	1	Food	Provisioning	46	46	0.415	0.31	1.03	0.22	Crop	Woody	Tropical	Field
WoS10.71	1	Water	Regulation	12	12	11.7	0.67	14.73	0.54	Crop	Herbaceous	Temperate	Field
WoS10.71	1	Nitrogen	Support	12	12	138	29.2	33.65	2.85	Crop	Herbaceous	Temperate	Field
WoS10.71	1	Climate	Regulation	12	12	42.5	8.9	16.5	1.6	Crop	Herbaceous	Temperate	Field
WoS10.71	1	Climate	Regulation	12	12	3.1	0.25	1.75	0.25	Crop	Herbaceous	Temperate	Field
WoS10.71	1	Nitrogen	Support	12	12	0.3	0.05	0.19	0.01	Crop	Herbaceous	Temperate	Field
WoS10.71	1	Water	Regulation	12	12	11.7	0.67	19	2	Pasture	NA	Temperate	Field
WoS10.71	1	Nitrogen	Support	12	12	138	101.15	91.95	98.55	Pasture	NA	Temperate	Field
WoS10.71	1	Climate	Regulation	12	12	42.5	30.83	21.25	1.56	Pasture	NA	Temperate	Field
WoS10.71	1	Climate	Regulation	12	12	3.1	0.87	2.75	0.87	Pasture	NA	Temperate	Field
WoS10.71	1	Nitrogen	Support	12	12	0.3	0.17	0.3	0.24	Pasture	NA	Temperate	Field
WoS10.107	-1	Pests	Regulation	23	23	16	5.19	10	7.41	Crop	Herbaceous	Tropical	Landscape
WoS10.138	-1	Pests	Regulation	6	6	71.43	8.53	39.35	3.92	Crop	Woody	Temperate	Field
WoS10.139	1	SoilR	Regulation	4	4	5.51	3.73	2.68	2.36	Crop	Woody	Temperate	Field
WoS10.139	1	Phosphorus	Support	4	4	8.1	6.22	55.83	47.72	Crop	Woody	Temperate	Field
WoS10.139	-1	Nitrogen	Support	4	4	11.78	1.8	10.22	1.53	Crop	Woody	Temperate	Field
WoSE.4	1	Food	Provisioning	4	4	1.88	0.48	0.27	0.24	Crop	Herbaceous	Temperate	Field
WoSE.4	1	Food	Provisioning	4	4	1.88	0.48	1.68	0.18	Pasture	NA	Temperate	Field
