# Supplementary material for: Contributions of Hedgerows to People: A Global Meta-Analysis
Source: Frontiers journal article supplement (doi:10.3389/fcosc.2021.789612), 2021-12-22
Supplement: Table_13.XLSX [file Table_13.XLSX]

## Sheet: Hoja1
Identifier	Response	Ecosystem.Service	nHedgerow	nControl	New.sign	Hedgerow.Value	Hedgerow.SD	Natural.habitat.Value	Natural.habitat.SD	Natural.habitat.type	Climate.type	Spatial.Scale.Focus
WoS3.12	Pests	Regulation	12	12	-1	0.65	0.37	0.1	0.15	Forest/Woodland	Temperate	Field
WoS3.12	Pests	Regulation	13	12	-1	0.4	0.3	0.05	0.19	Forest/Woodland	Temperate	Field
WoS3.12	Pests	Regulation	25	25	-1	0.2	0.07	0.4	0.15	Forest/Woodland	Temperate	Field
WoS3.12	Pests	Regulation	25	25	-1	0.1	0.04	0.25	0.15	Forest/Woodland	Temperate	Field
WoS3.12	Pests	Regulation	25	25	-1	0.6	0.3	0.15	0.04	Forest/Woodland	Temperate	Field
WoS3.12	Pests	Regulation	25	25	-1	0.2	0.74	0.15	0.04	Forest/Woodland	Temperate	Field
WoS3.12	Pests	Regulation	25	25	-1	0.1	0.59	0.2	0.01	Forest/Woodland	Temperate	Field
WoS3.12	Pests	Regulation	25	25	-1	0.2	0.07	0.05	0.01	Forest/Woodland	Temperate	Field
WoS3.20	Nitrogen	Support	58	58	1	25	10	35	15	Forest/Woodland	Temperate	Field
WoS3.20	Nitrogen	Support	58	58	1	25	10	25	8	Forest/Woodland	Temperate	Field
WoS3.57	SoilF	Support	8	8	1	9.62	8.6	11.06	11.03	Forest/Woodland	Temperate	Landscape
WoS3.57	SoilF	Support	8	8	1	88.2	8.46	93.35	11.2	Forest/Woodland	Temperate	Landscape
WoS3.57	SoilF	Support	8	8	-1	0.52	0.48	0.49	0.42	Forest/Woodland	Temperate	Landscape
WoS3.63	SoilF	Support	5	5	1	15.5	15.56	30.5	35.19	Forest/Woodland	Temperate	Field
WoS3.63	SoilF	Support	5	5	1	3.5	48.89	0	0	Forest/Woodland	Temperate	Field
WoS3.63	SoilF	Support	5	5	1	0.5	2.22	9	8.89	Forest/Woodland	Temperate	Field
WoS6.86	Pests	Regulation	183	183	-1	16.6	16.61	10.89	9.04	Forest/Woodland	Temperate	Field
WoS6.86	Pests	Regulation	183	183	-1	16.6	16.61	11.78	11.87	Forest/Woodland	Temperate	Field
WoS6.91	SoilF	Support	18	18	1	0.95	0.05	1.15	0.35	Forest/Woodland	Tropical	Landscape
WoS6.91	SoilF	Support	18	18	1	0.355	0.15	0.4	0.15	Forest/Woodland	Tropical	Landscape
WoS6.91	SoilF	Support	18	18	1	0.95	0.05	1.55	0.05	Forest/Woodland	Tropical	Landscape
WoS6.91	SoilF	Support	18	18	1	0.355	0.15	0.51	0.16	Forest/Woodland	Tropical	Landscape
WoS6.91	SoilF	Support	18	18	1	0.95	0.05	0.915	0.39	Forest/Woodland	Tropical	Landscape
WoS6.91	SoilF	Support	18	18	1	0.355	0.15	0.59	0.06	Forest/Woodland	Tropical	Landscape
WoS6.91	SoilF	Support	18	18	1	0.95	0.05	2.2	0.2	Forest/Woodland	Tropical	Landscape
WoS6.91	SoilF	Support	18	18	1	0.355	0.15	1	0	Forest/Woodland	Tropical	Landscape
WoS6.91	SoilF	Support	18	18	1	0.95	0.05	2.7	0.1	Forest/Woodland	Tropical	Landscape
WoS6.91	SoilF	Support	18	18	1	0.355	0.15	0.47	0	Forest/Woodland	Tropical	Landscape
WoS7.28	Nitrogen	Support	6	6	1	1.79	0.73	2.27	1.22	Forest/Woodland	Tropical	Landscape
WoS7.28	Nitrogen	Support	6	6	1	1.05	0.49	1.33	0.49	Forest/Woodland	Tropical	Landscape
WoS7.28	Nitrogen	Support	6	6	1	8.54	2.45	10.3	3.43	Forest/Woodland	Tropical	Landscape
WoS7.28	Nitrogen	Support	6	6	1	7.51	2.2	8.49	3.67	Forest/Woodland	Tropical	Landscape
WoS7.28	Nitrogen	Support	6	6	1	23.77	10.29	48.2	7.59	Forest/Woodland	Tropical	Landscape
WoS7.94	SoilF	Support	18	18	1	4.59	10.35	4.59	10.35	Forest/Woodland	Temperate	Landscape
WoS7.94	SoilF	Support	18	18	1	43.15	47.52	43.15	47.52	Forest/Woodland	Temperate	Field
WoS7.94	SoilF	Support	18	18	-1	1.09	0.08	1.09	0.08	Forest/Woodland	Temperate	Field
WoS7.94	Nitrogen	Support	18	18	1	0.19	0.04	0.19	0.04	Forest/Woodland	Temperate	Field
WoS8.82	Pests	Regulation	4	4	-1	51	15.66	28	21.94	Forest/Woodland	Temperate	Landscape
