# Supplementary material for: Contributions of Hedgerows to People: A Global Meta-Analysis
Source: Frontiers journal article supplement (doi:10.3389/fcosc.2021.789612), 2021-12-22
Supplement: Table_14.DOCX [file Table_14.DOCX]

##Unfortunately text files (.txt) are not supporting as a Data sheet by Frontiers submission system##########

######First of all, please transform Data_file_S5.xlsx into Data_file_S5.txt separated by tabulator##########

rm(list=ls(all=TRUE))

#install.packages("ggplot2",dep=TRUE)

#install.packages("sf",dep=TRUE)

#install.packages("ggspatial",dep=TRUE)

#install.packages("maps",dep=TRUE)

#install.packages("mapdata",dep=TRUE)

#install.packages("rnaturalearth",dep=TRUE)

#install.packages("rnaturalearthdata",dep=TRUE)

#install.packages("rland",dep=TRUE)

library(ggplot2) # ggplot2

library(sf) # spatial data

library(ggspatial) # visualization of spatial data

library(maps) # spatial databases

library(mapdata) # spatial databases

library(rnaturalearth) # spatial databases

library(rnaturalearthdata) # spatial databases

#library(rland)

world <- map_data("world")

tus_datos<-read.table("C:/Frontiers/Data_file_S5.txt",header=TRUE,dec=",")

mains<-ggplot() +

geom_polygon(data = world,

aes(x = long, y = lat, group = group),

colour="grey70", fill="white") +

geom_point(data = tus_datos,

aes(x = long, y = lat), colour="red", size=2, shape=8)

coord_quickmap()+

theme_void()+

theme()

mains

ggsave(filename="C:/Frontiers/R1/Figure1.jpg",dpi = 1200, plot=mains, width = 75,height = 50, units = "mm")
